# Supplementary material
Source: Research Square preprint supplement (doi:10.21203/rs.3.rs-8283198/v1)
Supplement: Supplementary file 1 [file 262d57971a151d7fdaf4928d.xlsx]

## Sheet: GS
Category	GeneSet	N_genes	N_overlap	p	adjP	genes	link
Curated_gene_sets	NIKOLSKY_BREAST_CANCER_8Q23_Q24_AMPLICON	149	38	8.12836e-09	5.27937e-05	C8orf76:KIAA0196:FAM83H:EPPK1:PLEC:PARP10:GRINA:SPATC1:OPLAH:CYC1:SHARPIN:MAF1:MROH1:SLC52A2:FBXL6:ADCK5:SLC39A4:VPS28:TONSL:CYHR1:KIFC2:FOXH1:PPP1R16A:GPT:MFSD3:RECQL4:LRRC14:LRRC24:C8orf82:ARHGAP39:ZNF251:ZNF34:RPL8:ZNF517:ZNF7:ZNF250:ZNF16:C8orf33	http://www.gsea-msigdb.org/gsea/msigdb/human/geneset/NIKOLSKY_BREAST_CANCER_8Q23_Q24_AMPLICON
Curated_gene_sets	HESSON_TUMOR_SUPPRESSOR_CLUSTER_3P21_3	8	7	4.67942e-07	0.00114456	HYAL2:RASSF1:ZMYND10:NPRL2:CYB561D2:TMEM115:CACNA2D2	http://www.gsea-msigdb.org/gsea/msigdb/human/geneset/HESSON_TUMOR_SUPPRESSOR_CLUSTER_3P21_3
Curated_gene_sets	LASTOWSKA_NEUROBLASTOMA_COPY_NUMBER_DN	777	115	5.75287e-07	0.00114456	TNFRSF25:TARDBP:MAD2L2:SEPN1:MTFR1L:PAQR7:STMN1:PAFAH2:CEP85:SH3BGRL3:CD52:PIGV:ZDHHC18:MEAF6:SNIP1:DNALI1:EPHA10:MANEAL:C1orf122:MTF1:SF3A3:UTP11L:RRAGC:COL9A2:FOXJ3:ZMYND12:PPCS:CCDC23:MED8:SZT2:HYI:PTPRF:KDM4A:ST3GAL3:IPO13:ATP6V0B:DMAP1:ERI3:RNF220:FAF1:PIGK:USP33:FAM73A:PTGFR:SSX2IP:PTBP2:IQSEC1:NUP210:FGD5:RAB5A:RBMS3:STT3B:EIF1B:ZNF621:CTNNB1:TRAK1:SEC22C:SS18L2:NKTR:KRBOX1:ZKSCAN7:ZNF502:…	http://www.gsea-msigdb.org/gsea/msigdb/human/geneset/LASTOWSKA_NEUROBLASTOMA_COPY_NUMBER_DN
Curated_gene_sets	NIKOLSKY_BREAST_CANCER_15Q26_AMPLICON	21	11	7.04886e-07	0.00114456	FAM169B:IGF1R:SYNM:TTC23:LRRC28:LYSMD4:LINS:ASB7:CHSY1:VIMP:SNRPA1	http://www.gsea-msigdb.org/gsea/msigdb/human/geneset/NIKOLSKY_BREAST_CANCER_15Q26_AMPLICON
Curated_gene_sets	ROVERSI_GLIOMA_COPY_NUMBER_UP	97	23	2.48002e-05	0.0322155	GALNT5:ARHGAP1:CKAP5:LRP4:PACSIN3:DDB2:ACP2:NR1H3:MADD:MYBPC3:SPI1:PSMC3:PTPRJ:GALNT6:APOC4-APOC2:APOC4:APOC2:CLPTM1:CLASRP:MARK4:EXOC3L2:CKM:KLC3:ERCC2	http://www.gsea-msigdb.org/gsea/msigdb/human/geneset/ROVERSI_GLIOMA_COPY_NUMBER_UP
TF_targets	PAX2_02	254	43	0.000105715	0.047926	CDC20:RNF220:LRRTM4:LRRTM1:RBMS3:GPX1:RHOA:TCTA:IFRD2:CACNA2D2:LSAMP:EPHB1:GRID2:PPP3CA:NR2F1:KLHL3:RGL2:POU3F2:NMBR:PARK2:PACRG:FOXP2:RUNX1T1:PLEC:NFIB:NTRK2:PTCH1:MUC15:BDNF:AQP5:POC1B:IGF1:RTN1:EIF5:SEMA6D:TCF12:PAFAH1B1:HOXB2:EPB41L3:MEX3C:TCF4:NDUFA13:PHACTR3	http://www.gsea-msigdb.org/gsea/msigdb/human/geneset/PAX2_02
TF_targets	HMGA1_TARGET_GENES	828	109	0.000183617	0.047926	TNFRSF25:MTFR1L:FOXJ3:DEPDC1:RP5-887A10.1:CNN3:DPYD-AS1:VAV3:TPR:SH3YL1:ROCK2:KIAA1841:LINC01102:LINC01103:DDX18:ZEB2:TEX41:COBLL1:DHRS9:ABI2:ICOS:ACADL:RP11-384O8.1:INPP5D:RBMS3:NKTR:ANO10:QRICH1:DAG1:IQCF1:CCDC66:FAM208A:PDZRN3:MIR4795:ANKUB1:RNF13:FAM194A:RP11-432B6.3:IFT80:LINC01088:CCSER1:DNAJB14:LEF1:PRSS12:ARHGAP10:CTD-2161F6.3:MTRR:CCL28:PAIP1:MRPS30:TMEM161B:BNIP1:FBXO9:CASC6:MIR2113:TAA…	http://www.gsea-msigdb.org/gsea/msigdb/human/geneset/HMGA1_TARGET_GENES
TF_targets	STAT6_01	264	43	0.000254424	0.047926	STMN1:RNF220:CLCA3P:RWDD3:BCL11A:NR4A2:KCNH7:ECEL1:EFHD1:SAG:USP40:RBMS3:ALS2CL:CACNA2D3:CADM2:VGLL3:SHOX2:GRID2:EMCN:ARRDC3:GPR150:KLHL3:FBXO9:SLC2A12:LRRN3:RBM12B:RBM18:MRRF:SLC25A28:TMEM216:MTA2:SLC38A1:DIP2B:KITLG:COCH:VRK1:TRAF3:C15orf26:HN1L:MAPK4:TCF4:PHACTR3:CXADR	http://www.gsea-msigdb.org/gsea/msigdb/human/geneset/STAT6_01
TF_targets	AACTTT_UNKNOWN	1871	219	0.000291772	0.047926	FAM110D:SH3BGRL3:YRDC:C1orf122:PTPRF:RNF220:ST6GALNAC3:ST6GALNAC5:PTBP2:GOLPH3L:CKS1B:ROCK2:GREB1:C2orf43:BCL11A:REL:LRRTM4:LRRTM1:KIAA1211L:AFF3:POU3F3:LRP1B:KYNU:ZEB2:NR4A2:RAPGEF4:CDCA7:OLA1:CDK15:BMPR2:NRP2:INO80D:PTH2R:ERBB4:IKZF2:ABCA12:GIGYF2:KCNJ13:DGKD:BHLHE40:WNT7A:KCNH8:RBMS3:CTNNB1:IMPDH2:LAMB2:GPX1:CAMKV:SEMA3F:CISH:DOCK3:MANF:CACNA2D3:HESX1:MITF:PPP4R2:LSAMP:EPHB1:PPP2R3A:STAG1:RNF1…	http://www.gsea-msigdb.org/gsea/msigdb/human/geneset/AACTTT_UNKNOWN
TF_targets	TGGAAA_NFAT_Q4_01	1847	216	0.000337236	0.047926	ESPN:STMN1:FAM110D:ZNF593:ZDHHC18:YRDC:C1orf122:MTF1:FHL3:CLDN19:WDR65:TMEM125:RNF220:GADD45A:ST6GALNAC3:DNASE2B:CTBS:MCOLN3:CLCA3P:RWDD3:CKS1B:GREB1:BCL11A:EVA1A:LRRTM4:LRRTM1:VAMP5:TSGA10:AFF3:POU3F3:LRP1B:KYNU:ZEB2:NR4A2:KCNH7:SCRN3:WIPF1:MTX2:BMPR2:CTLA4:INO80D:ERBB4:IKZF2:SLC4A3:PAX3:CCDC140:DIS3L2:ECEL1:EFHD1:GIGYF2:KCNJ13:SAG:USP40:BHLHE40:RBMS3:ABHD5:ZNF502:ALS2CL:ARIH2:CCDC71:GPX1:RHOA:T…	http://www.gsea-msigdb.org/gsea/msigdb/human/geneset/TGGAAA_NFAT_Q4_01
TF_targets	MYOD_Q6	237	39	0.000389576	0.047926	MANEAL:C1orf210:RNF220:GOLPH3L:POU3F3:GTDC1:ITGA6:ERBB4:IKZF2:CHRNG:DGKD:CRELD1:NCKIPSD:DALRD3:NDUFAF3:ASB14:GRID2:H2AFZ:CCNJL:ARL4A:LURAP1L:CER1:CRAT:RHOBTB1:KAZALD1:SPI1:CELF1:PTPRJ:TMEM109:CXCR5:LIMA1:RBM26:KCNH5:NPEPPS:SPOP:SYT4:CKM:PHACTR3:C21orf62	http://www.gsea-msigdb.org/gsea/msigdb/human/geneset/MYOD_Q6
TF_targets	STAT5A_03	262	42	0.000419732	0.047926	STMN1:TIE1:DNASE2B:CLCA3P:RWDD3:BCL11A:KCNH7:WNT10A:ECEL1:EFHD1:KCNJ13:SAG:USP40:RBMS3:ALS2CL:CACNA2D3:CADM2:VGLL3:PPP2R3A:GRID2:EMCN:ARRDC3:GPR150:KLHL3:FBXO9:LRRN3:CNGB3:RBM12B:SLC25A28:FAM178A:TMEM216:DIP2B:KITLG:COCH:VRK1:TRAF3:MNS1:C15orf26:TCF4:LAMP5:PHACTR3:CXADR	http://www.gsea-msigdb.org/gsea/msigdb/human/geneset/STAT5A_03
TF_targets	AAAYRNCTG_UNKNOWN	362	54	0.000445535	0.047926	DNAJB4:LHX9:MGAT4A:CYBRD1:RAPGEF4:MAP2:ERBB4:RBMS3:TUSC2:MANF:CACNA2D3:HESX1:ZNF654:PPP2R3A:STAG1:PFN2:PPP3CA:FGF10:NR2F1:KLHL3:BAI3:EPHA7:PARK2:PACRG:FOXP2:PLEC:DMRT1:SMARCA2:CER1:NTRK2:CRAT:HPSE2:EMX2:MTA2:MAP6:SOX5:VDR:AQP2:KITLG:PMCH:IGF1:HIP1R:C12orf65:LMO7:POU4F1:FOXG1:COCH:RTN1:PPP2R5E:EIF5:SEMA6D:C15orf26:ZNF521:C20orf197	http://www.gsea-msigdb.org/gsea/msigdb/human/geneset/AAAYRNCTG_UNKNOWN
TF_targets	CDP_02	109	22	0.000446627	0.047926	SLC6A9:CDCA7:WDR12:CARF:IKZF2:GPX1:CACNA2D3:LSAMP:PPM1L:PITX2:HCN1:MEF2C:CPEB4:TFAP2D:RUNX1T1:AK8:C9orf9:PTF1A:PRKAG1:TCF4:TSHZ2:PHACTR3	http://www.gsea-msigdb.org/gsea/msigdb/human/geneset/CDP_02
TF_targets	FAC1_01	218	36	0.000596682	0.047926	DNALI1:BCL11A:AFF3:OLA1:CTLA4:NRP2:IKZF2:RAB5A:PBRM1:FOXP1:EMCN:PITX2:POU4F2:NR3C2:NR2F1:POU4F3:EYA4:SHARPIN:MAF1:SMARCA2:NFIB:NTRK2:LHX6:C11orf30:SOX5:PRKAG1:RHEBL1:IGF1:HN1L:MNT:MEOX1:FAM117A:ITGA3:POLG2:NKX2-2:FOXA2	http://www.gsea-msigdb.org/gsea/msigdb/human/geneset/FAC1_01
TF_targets	CGTSACG_PAX3_B	141	26	0.000623879	0.047926	ZZZ3:BCL11A:ZEB2:NR4A2:GIGYF2:BHLHE40:PBRM1:GYG1:TSC22D2:PITX2:GEM:RBM18:MRRF:NKX2-3:PDZD7:SLC18A2:C11orf30:VPS37B:NUBPL:BCL11B:USP8:WDR81:PEPD:PHACTR3:FAM217B:PPP1R3D	http://www.gsea-msigdb.org/gsea/msigdb/human/geneset/CGTSACG_PAX3_B
TF_targets	AR_03	57	14	0.000632247	0.047926	TRIM63:DNAJB4:ITGA6:IKZF2:ZNF654:CPEB4:BAI3:BDNF:UVRAG:KCNJ1:LARP4:SLAIN1:KCNH5:DLX3	http://www.gsea-msigdb.org/gsea/msigdb/human/geneset/AR_03
TF_targets	PBX1_01	251	40	0.0006393	0.047926	STMN1:SLC6A9:DPYD:PTPRC:REV1:ERBB4:PAX3:STT3B:GPX1:CACNA2D3:MITF:ROPN1:MSL2:SCHIP1:PPM1L:PRDM8:FGF5:EMCN:LEF1:NFIB:AK8:C9orf9:COMMD3:VAX1:SLC18A2:EMX2:CDHR5:SCT:BDNF:FEZ1:AQP5:SIX6:HOXB2:FAM117A:AXIN2:SYT4:NR2C2AP:KCTD15:TSHZ2:PHACTR3	http://www.gsea-msigdb.org/gsea/msigdb/human/geneset/PBX1_01
TF_targets	TATAAA_TATA_01	1257	152	0.000641728	0.047926	TNFRSF25:TRIM63:FAM110D:SH3BGRL3:YRDC:C1orf122:ZNF691:SLC2A1:PTCH2:ZZZ3:PDIA6:EFEMP1:REG3G:REG1B:REG1A:REG3A:CTNNA2:TSGA10:RAPGEF4:TRAK2:CARF:CYP20A1:CTLA4:NRP2:PAX3:CCDC140:KCNJ13:NEU2:TRPM8:IMPDH2:KLHDC8B:GPX1:RHOA:TCTA:MON1A:MANF:HESX1:MITF:FOXP1:VGLL3:POU1F1:ZNF654:MYLK:TM4SF4:P2RY12:SHOX2:SCHIP1:TRIM59:FGF5:GRID2:H2AFZ:DDIT4L:PITX2:NDST3:C6:C5orf51:SEPP1:HMGCS1:NNT:FGF10:ARRDC3:NR2F1:ANKRD32…	http://www.gsea-msigdb.org/gsea/msigdb/human/geneset/TATAAA_TATA_01
TF_targets	FOXO1_01	243	39	0.000644745	0.047926	TRIM63:MED8:SZT2:EFEMP1:ZEB2:NR4A2:SCRN3:IKZF2:IMPDH2:HESX1:MITF:ZNF654:EPHB1:ELOVL6:PITX2:SLC10A7:NIM1K:NNT:GPR63:POU3F2:FOXP2:PTPRD:NFIB:TSC1:BMI1:SLC25A28:SEMA4G:BDNF:PMCH:HCAR3:SYT16:BCL11B:SEMA6D:LINS:ASB7:AXIN2:KCNN1:NKX2-2:PHACTR3	http://www.gsea-msigdb.org/gsea/msigdb/human/geneset/FOXO1_01
TF_targets	SFMBT1_TARGET_GENES	1478	175	0.000700349	0.0488055	PAFAH2:SH3BGRL3:SF3A3:FOXJ3:DMAP1:PLK3:SSX2IP:SNX7:VAV3:NPL:ROCK2:KLHL29:CYP1B1:FANCL:DDX18:NR4A2:PDK1:BHLHE40:STT3B:EIF1B:CTNNB1:SS18L2:ANO10:SLC25A20:P4HTM:DAG1:GNAI2:TUSC2:ALAS1:ARHGEF3:APPL1:CGGBP1:SLC35G2:RP11-85F14.5:GYG1:WWTR1:WWTR1-AS1:COMMD2:PFN2:EIF2A:RSRC1:DNAJB14:H2AFZ:UBE2D3:ELOVL6:LSM6:MTRR:FASTKD3:OXCT1-AS1:C5orf51:ANXA2R:AC025171.1:RP11-53O19.1:MRPS30:NR2F1:FAM172A:KIAA0825:ANKRD3…	http://www.gsea-msigdb.org/gsea/msigdb/human/geneset/SFMBT1_TARGET_GENES
GO_mf	GOMF_TRACE_AMINE_RECEPTOR_ACTIVITY	7	7	6.37114e-08	0.000112897	TAAR9:TAAR8:TAAR6:TAAR5:TAAR3:TAAR2:TAAR1	http://www.gsea-msigdb.org/gsea/msigdb/human/geneset/GOMF_TRACE_AMINE_RECEPTOR_ACTIVITY
GO_bp	GOBP_NEUROGENESIS	1611	219	8.09817e-09	5.89651e-05	MINOS1-NBL1:NBL1:STMN1:EPHA10:EDN2:CCDC23:CDC20:SZT2:PTPRF:KDM4A:ARTN:RNF220:LRRC7:LHX8:USP33:LPAR3:MCOLN3:LPPR5:NTNG1:LHX9:FAM150B:BCL11A:CTNNA2:NR4A2:ITGA6:TRAK2:ALS2:BMPR2:ABI2:RAPH1:NRP2:MAP2:ERBB4:VWC2L:WNT10A:EPHA4:EFHD1:GIGYF2:NGEF:BHLHE40:GHRL:IQSEC1:HDAC11:WNT7A:CTNNB1:ULK4:TRAK1:POMGNT2:NCKIPSD:LAMB2:RHOA:DAG1:AMIGO3:GMPPB:SEMA3F:GNAT1:MANF:TWF2:SEMA3G:ARF4:ROBO2:KALRN:RYK:EPHB1:NCK1:HL…	http://www.gsea-msigdb.org/gsea/msigdb/human/geneset/GOBP_NEUROGENESIS
GO_bp	GOBP_GENERATION_OF_NEURONS	1392	193	1.52148e-08	5.89651e-05	MINOS1-NBL1:NBL1:STMN1:EPHA10:EDN2:CCDC23:CDC20:SZT2:PTPRF:KDM4A:ARTN:RNF220:LRRC7:LHX8:USP33:LPAR3:MCOLN3:LPPR5:NTNG1:LHX9:FAM150B:BCL11A:CTNNA2:NR4A2:ITGA6:ALS2:BMPR2:ABI2:RAPH1:NRP2:MAP2:ERBB4:VWC2L:WNT10A:EPHA4:EFHD1:GIGYF2:NGEF:GHRL:IQSEC1:WNT7A:CTNNB1:ULK4:POMGNT2:NCKIPSD:LAMB2:RHOA:DAG1:AMIGO3:GMPPB:SEMA3F:GNAT1:MANF:TWF2:SEMA3G:ARF4:ROBO2:KALRN:RYK:EPHB1:NCK1:SHOX2:PAQR3:GRID2:PPP3CA:LEF1…	http://www.gsea-msigdb.org/gsea/msigdb/human/geneset/GOBP_GENERATION_OF_NEURONS
GO_bp	GOBP_REGULATION_OF_NEURON_PROJECTION_DEVELOPMENT	444	78	4.3956e-08	0.000113568	CDC20:PTPRF:LRRC7:LPAR3:LPPR5:NTNG1:FAM150B:BCL11A:CTNNA2:ITGA6:BMPR2:ABI2:MAP2:EPHA4:NGEF:WNT7A:ULK4:NCKIPSD:RHOA:AMIGO3:GMPPB:SEMA3F:TWF2:SEMA3G:ROBO2:RYK:NCK1:SHOX2:PAQR3:GRID2:PPP3CA:POU4F2:ENC1:NR2F1:EFNA5:SPOCK1:MIR133B:BAI3:EPHA7:FUT9:POU3F2:TMEM106B:KANK1:VLDLR:PTPRD:NTRK2:NTNG2:TSC1:GATA3:CAMK1D:VIM:ZFYVE27:SEMA4G:KIAA1598:MIR210:BDNF:LRP4:PPP2R5B:MAP6:TSKU:FEZ1:DIP2B:ATF1:AVIL:PRKD1:BAG…	http://www.gsea-msigdb.org/gsea/msigdb/human/geneset/GOBP_REGULATION_OF_NEURON_PROJECTION_DEVELOPMENT
GO_bp	GOBP_CELL_PROJECTION_ORGANIZATION	1527	203	1.61329e-07	0.000312615	ESPN:MINOS1-NBL1:NBL1:STMN1:EPHA10:EDN2:CCDC23:CDC20:SZT2:PTPRF:ARTN:LRRC7:USP33:SSX2IP:LPAR3:LPPR5:NTNG1:VAV3:LHX9:FAM110C:SH3YL1:FAM150B:KCNF1:BCL11A:CTNNA2:NR4A2:ERMN:ITGA6:TMEM237:ALS2:BMPR2:ABI2:RAPH1:NRP2:MAP2:SPAG16:EPHA4:EFHD1:NGEF:GHRL:IQSEC1:WNT7A:FGD5:RAB5A:CTNNB1:ULK4:CCDC13:NCKIPSD:LAMB2:RHOA:DAG1:AMIGO3:GMPPB:SEMA3F:ZMYND10:MANF:POC1A:TWF2:SEMA3G:CCDC66:ARF4:ROBO2:MYLK:ROPN1:KALRN:R…	http://www.gsea-msigdb.org/gsea/msigdb/human/geneset/GOBP_CELL_PROJECTION_ORGANIZATION
GO_bp	GOBP_NEURON_DEVELOPMENT	1070	149	5.53887e-07	0.000858635	MINOS1-NBL1:NBL1:STMN1:EPHA10:EDN2:CCDC23:CDC20:SZT2:PTPRF:ARTN:RNF220:LRRC7:LHX8:USP33:LPAR3:LPPR5:NTNG1:LHX9:FAM150B:BCL11A:CTNNA2:NR4A2:ITGA6:ALS2:BMPR2:ABI2:RAPH1:NRP2:MAP2:EPHA4:EFHD1:NGEF:GHRL:IQSEC1:WNT7A:CTNNB1:ULK4:NCKIPSD:LAMB2:RHOA:DAG1:AMIGO3:GMPPB:SEMA3F:GNAT1:MANF:TWF2:SEMA3G:ARF4:ROBO2:KALRN:RYK:EPHB1:NCK1:SHOX2:PAQR3:GRID2:PPP3CA:SEC24B:POU4F2:EDNRA:HCN1:ENC1:MEF2C:GPR98:NR2F1:EFN…	http://www.gsea-msigdb.org/gsea/msigdb/human/geneset/GOBP_NEURON_DEVELOPMENT
GO_bp	GOBP_CELL_MORPHOGENESIS_INVOLVED_IN_DIFFERENTIATION	608	93	1.69504e-06	0.00218971	STMN1:EPHA10:EDN2:MPL:SZT2:ARTN:USP33:LPAR3:NTNG1:LHX9:CTNNA2:NR4A2:ALS2:BMPR2:ABI2:RAPH1:NRP2:MAP2:EPHA4:NGEF:WNT7A:CTNNB1:LAMB2:DAG1:SEMA3F:TWF2:SEMA3G:ROBO2:KALRN:RYK:EPHB1:SHOX2:PPP3CA:LEF1:SEC24B:POU4F2:EDNRA:MEF2C:EFNA5:SLC25A46:GRXCR2:POU4F3:PKHD1:BAI3:EPHA7:POU3F2:TMEM106B:AUTS2:MET:VLDLR:PTPRD:NFIB:NTRK2:PTCH1:NTNG2:GATA3:ZFYVE27:SEMA4G:PDZD7:KIAA1598:VAX1:FGFR2:BDNF:LRP4:SPI1:MAP6:TSKU:…	http://www.gsea-msigdb.org/gsea/msigdb/human/geneset/GOBP_CELL_MORPHOGENESIS_INVOLVED_IN_DIFFERENTIATION
GO_bp	GOBP_REGULATION_OF_CELL_PROJECTION_ORGANIZATION	672	99	4.2584e-06	0.00471526	CDC20:PTPRF:LRRC7:LPAR3:LPPR5:NTNG1:FAM110C:SH3YL1:FAM150B:BCL11A:CTNNA2:ERMN:ITGA6:BMPR2:ABI2:MAP2:EPHA4:NGEF:WNT7A:RAB5A:ULK4:NCKIPSD:RHOA:AMIGO3:GMPPB:SEMA3F:ZMYND10:TWF2:SEMA3G:ROBO2:RYK:NCK1:PFN2:P2RY12:SHOX2:PAQR3:GRID2:PPP3CA:POU4F2:ADAMTS16:ENC1:NR2F1:EFNA5:FER:SPOCK1:MIR133B:BAI3:EPHA7:FUT9:POU3F2:TMEM106B:AUTS2:CAV1:KANK1:VLDLR:PTPRD:NTRK2:TBC1D2:RABGAP1:NTNG2:TSC1:GATA3:CAMK1D:VIM:ZFYV…	http://www.gsea-msigdb.org/gsea/msigdb/human/geneset/GOBP_REGULATION_OF_CELL_PROJECTION_ORGANIZATION
GO_bp	GOBP_AXON_DEVELOPMENT	468	74	5.81664e-06	0.0056356	STMN1:EPHA10:EDN2:CCDC23:SZT2:PTPRF:ARTN:USP33:LPAR3:NTNG1:LHX9:CTNNA2:NR4A2:ALS2:BMPR2:RAPH1:NRP2:MAP2:EPHA4:WNT7A:LAMB2:DAG1:SEMA3F:TWF2:SEMA3G:ROBO2:KALRN:RYK:EPHB1:SHOX2:POU4F2:EDNRA:EFNA5:SLC25A46:CTNNA1:POU4F3:EPHA7:POU3F2:AUTS2:NFIB:NTRK2:PTCH1:NTNG2:GATA3:ZFYVE27:CRTAC1:SEMA4G:KIAA1598:VAX1:FGFR2:BDNF:LRP4:MAP6:TSKU:FEZ1:DIP2B:POU4F1:FOXG1:BCL11B:HSP90AA1:SEMA6D:IGF1R:METRN:MAPK8IP3:PAFAH…	http://www.gsea-msigdb.org/gsea/msigdb/human/geneset/GOBP_AXON_DEVELOPMENT
GO_bp	GOBP_CELL_PART_MORPHOGENESIS	641	94	8.92307e-06	0.00768475	MINOS1-NBL1:NBL1:STMN1:EPHA10:EDN2:SZT2:ARTN:USP33:LPAR3:NTNG1:LHX9:PNPT1:BCL11A:CTNNA2:NR4A2:ALS2:BMPR2:ABI2:RAPH1:NRP2:MAP2:EPHA4:NGEF:WNT7A:CTNNB1:LAMB2:RHOA:DAG1:SEMA3F:TWF2:SEMA3G:ROBO2:KALRN:RYK:EPHB1:SHOX2:PPP3CA:POU4F2:EDNRA:EFNA5:SLC25A46:POU4F3:BAI3:RIMS1:EPHA7:POU3F2:PARK2:TMEM106B:AUTS2:PLEC:KANK1:VLDLR:PTPRD:NFIB:NTRK2:PTCH1:NTNG2:GATA3:SPAG6:ZFYVE27:SEMA4G:KIAA1598:VAX1:FGFR2:BDNF:L…	http://www.gsea-msigdb.org/gsea/msigdb/human/geneset/GOBP_CELL_PART_MORPHOGENESIS
GO_bp	GOBP_DEVELOPMENTAL_CELL_GROWTH	224	42	1.07729e-05	0.00835004	EDN2:LPAR3:BCL11A:BMPR2:RAPH1:NRP2:MAP2:TGFBR2:CTNNB1:ARIH2:LAMB2:SEMA3F:TWF2:SEMA3G:FOXP1:RYK:POU4F2:EDNRA:EFNA5:POU4F3:RIMS1:EPHA7:PARK2:AUTS2:SPAG6:ZFYVE27:SEMA4G:KIAA1598:BDNF:DIP2B:IGF1:PARP2:AKAP6:HSP90AA1:SEMA6D:PAFAH1B1:SYT4:MEX3C:DCC:CTDP1:EDN3:CDH4	http://www.gsea-msigdb.org/gsea/msigdb/human/geneset/GOBP_DEVELOPMENTAL_CELL_GROWTH
GO_bp	GOBP_CELL_MORPHOGENESIS	903	122	2.4556e-05	0.0173031	MINOS1-NBL1:NBL1:STMN1:EPHA10:EDN2:MPL:SZT2:ARTN:USP33:LPAR3:NTNG1:LHX9:BCL11A:CTNNA2:NR4A2:ERMN:ALS2:BMPR2:ABI2:RAPH1:NRP2:MAP2:EPHA4:NGEF:WNT7A:FGD5:CTNNB1:LAMB2:RHOA:DAG1:SEMA3F:TWF2:SEMA3G:ROBO2:KALRN:RYK:EPHB1:SHOX2:PPP3CA:LEF1:SEC24B:POU4F2:EDNRA:RASA1:MEF2C:EFNA5:SLC25A46:GRXCR2:POU4F3:PKHD1:BAI3:RIMS1:EPHA7:POU3F2:PARK2:TMEM106B:AUTS2:MET:PLEC:KANK1:DMRT1:VLDLR:PTPRD:NFIB:ANXA1:NTRK2:FGD3…	http://www.gsea-msigdb.org/gsea/msigdb/human/geneset/GOBP_CELL_MORPHOGENESIS
Oncogenic_signatures	ESC_J1_UP_LATE.V1_UP	175	32	0.000185583	0.0273056	SEPN1:C1orf210:WLS:LPAR3:APOB:DPP4:ABHD5:TEX264:GYG1:LXN:SEL1L3:FGF5:SLC39A8:PRSS12:SEPP1:SPOCK1:LMBRD1:TFEC:GRINA:CUBN:HTRA1:MOGAT2:MYO7A:COL2A1:DRAM1:LMO7:AMN:TAX1BP3:B4GALNT2:GADD45B:APOC2:FOXA2	http://www.gsea-msigdb.org/gsea/msigdb/human/geneset/ESC_J1_UP_LATE.V1_UP
Oncogenic_signatures	EIF4E_UP	92	20	0.000288948	0.0273056	PPCS:MRPL30:MTX2:BHLHE40:OSBPL10:MON1A:BMP3:FBXO4:DNPH1:VPS28:C8orf33:LAMC3:NPM3:TALDO1:METTL1:UCHL3:C16orf91:TAX1BP3:FAM117A:ATP8B3	http://www.gsea-msigdb.org/gsea/msigdb/human/geneset/EIF4E_UP
GWAScatalog	Sleep duration (short sleep)	79	53	8.95103e-36	3.96083e-32	DPYD:USP4:GPX1:RHOA:TCTA:AMT:NICN1:DAG1:BSN:APEH:MST1:RNF123:AMIGO3:GMPPB:IP6K1:TRAIP:CAMKV:MST1R:MON1A:RBM6:RBM5:SEMA3F:GNAT1:GNAI2:LSMEM2:IFRD2:HYAL3:HYAL1:HYAL2:TUSC2:RASSF1:ZMYND10:NPRL2:CYB561D2:TMEM115:CACNA2D2:SLC39A8:SMAD5-AS1:SMAD5:MAD1L1:FOXP2:PSMC3:RAPSN:CELF1:NDUFS3:KBTBD4:C1QTNF4:MTCH2:AGBL2:FNBP4:NUP160:PTPRJ:SEMA6D:TCF4
GWAScatalog	Subcortical volume (min-P)	308	91	6.41113e-24	1.41846e-20	MINOS1-NBL1:NBL1:C1orf210:TIE1:MPL:CDC20:MED8:SZT2:HYI:CCDC17:FAF1:WLS:DENND1B:FANCL:BCL11A:FAHD2B:TMEM131:POU3F3:DPP4:COL5A2:FAM117B:ICA1L:WDR12:CARF:NBEAL1:CYP20A1:ABI2:MAP2:EPHA4:CCDC51:TMA7:ATRIP:TREX1:TMEM89:CELSR3:NCKIPSD:PRKAR2A:SLC25A20:ARIH2:P4HTM:WDR6:DALRD3:NDUFAF3:IMPDH2:QRICH1:USP19:LAMB2:CCDC71:KLHDC8B:C3orf84:USP4:GPX1:RHOA:TCTA:AMT:NICN1:DAG1:BSN:APEH:MST1:RNF123:AMIGO3:GMPPB:IP6K…
GWAScatalog	Brain morphology (MOSTest)	1049	198	2.87202e-22	4.23624e-19	MINOS1-NBL1:NBL1:C1orf210:TIE1:MPL:CDC20:MED8:SZT2:HYI:CCDC17:FAF1:WLS:DENND1B:FANCL:BCL11A:FAHD2B:TMEM131:POU3F3:DPP4:COL5A2:FAM117B:ICA1L:WDR12:CARF:NBEAL1:CYP20A1:ABI2:MAP2:EPHA4:CCDC51:TMA7:ATRIP:TREX1:TMEM89:CELSR3:NCKIPSD:PRKAR2A:SLC25A20:ARIH2:P4HTM:WDR6:DALRD3:NDUFAF3:IMPDH2:QRICH1:USP19:LAMB2:CCDC71:KLHDC8B:C3orf84:USP4:GPX1:RHOA:TCTA:AMT:NICN1:DAG1:BSN:APEH:MST1:RNF123:AMIGO3:GMPPB:IP6K…
GWAScatalog	Brain morphology (min-P)	345	94	6.97804e-22	7.71946e-19	MINOS1-NBL1:NBL1:C1orf210:TIE1:MPL:CDC20:MED8:SZT2:HYI:CCDC17:FAF1:WLS:DENND1B:FANCL:BCL11A:FAHD2B:TMEM131:POU3F3:DPP4:COL5A2:FAM117B:ICA1L:WDR12:CARF:NBEAL1:CYP20A1:ABI2:MAP2:EPHA4:CCDC51:TMA7:ATRIP:TREX1:TMEM89:CELSR3:NCKIPSD:PRKAR2A:SLC25A20:ARIH2:P4HTM:WDR6:DALRD3:NDUFAF3:IMPDH2:QRICH1:USP19:LAMB2:CCDC71:KLHDC8B:C3orf84:USP4:GPX1:RHOA:TCTA:AMT:NICN1:DAG1:BSN:APEH:MST1:RNF123:AMIGO3:GMPPB:IP6K…
GWAScatalog	Alzheimer's disease or fasting glucose levels (pleiotropy)	44	30	3.88768e-21	3.44059e-18	ATG13:ARHGAP1:CKAP5:MIR5582:SNORD67:LRP4-AS1:LRP4:ARFGAP2:PACSIN3:DDB2:ACP2:NR1H3:MADD:MYBPC3:SPI1:SLC39A13:PSMC3:RAPSN:CELF1:NDUFS3:PTPMT1:KBTBD4:FAM180B:C1QTNF4:MTCH2:AGBL2:FNBP4:NUP160:PTPRJ:OR4S1
GWAScatalog	Body mass index	1149	204	1.07758e-19	7.94714e-17	CCDC17:DEPDC1:LRRC7:AK5:ZZZ3:FUBP1:DNAJB4:GIPC2:PTBP2:DPYD:NTNG1:GOLPH3L:ATP6V1G3:SH3YL1:ACP1:TMEM18:FANCL:REG3G:REG1B:REG1A:REG3A:CTNNA2:POU3F3:MRPS9:MCM6:LRP1B:GRB14:COBLL1:RAPGEF4-AS1:ICOS:INO80D:MAP2:CPS1:ERBB4:MIR4776-2:SPAG16:IQSEC1:HDAC11:LINC00620:WNT7A:TRAK1:ZNF502:DAG1:BSN:APEH:MST1:RNF123:IP6K1:CDHR4:MST1R:MON1A:RBM6:RBM5:SEMA3F:GNAT1:GNAI2:IFRD2:HYAL3:HYAL2:NPRL2:ITIH4:CHDH:IL17RB:ACT…
GWAScatalog	Cortical surface area (MOSTest)	401	98	4.16986e-19	2.63595e-16	MINOS1-NBL1:NBL1:C1orf210:TIE1:MPL:CDC20:MED8:SZT2:HYI:CCDC17:FAF1:WLS:DENND1B:FANCL:BCL11A:FAHD2B:TMEM131:POU3F3:DPP4:COL5A2:FAM117B:ICA1L:WDR12:CARF:NBEAL1:CYP20A1:ABI2:MAP2:EPHA4:CCDC51:TMA7:ATRIP:TREX1:TMEM89:CELSR3:NCKIPSD:PRKAR2A:SLC25A20:ARIH2:P4HTM:WDR6:DALRD3:NDUFAF3:IMPDH2:QRICH1:USP19:LAMB2:CCDC71:KLHDC8B:C3orf84:USP4:GPX1:RHOA:TCTA:AMT:NICN1:DAG1:BSN:APEH:MST1:RNF123:AMIGO3:GMPPB:IP6K…
GWAScatalog	Bipolar II disorder	16	16	3.46701e-17	1.91769e-14	RFXANK:NR2C2AP:NCAN:HAPLN4:TM6SF2:SUGP1:MAU2:GATAD2A:TSSK6:NDUFA13:YJEFN3:CILP2:PBX4:LPAR2:GMIP:ATP13A1
GWAScatalog	Schizophrenia	659	124	3.25773e-14	1.60172e-11	MED8:PTPRF:KDM4A:ST3GAL3:SAMD13:PTBP2:DPYD:DPYD-AS1:MIR137HG:FANCL:MIR4432:LRRTM4:ZEB2:TEX41:NR4A2:DPP4:C2orf88:SPAG16:EFHD1:GIGYF2:KCNJ13:NGEF:RBMS3:MIR138-1:GNAT1:HYAL3:RASSF1:ALAS1:TLR9:TWF2:PPM1M:MIRLET7G:GLYCTK:SEMA3G:NT5DC2:PBRM1:ITIH4:FHIT:FOXP1:ARHGAP31:KALRN:PPP2R3A:MSL2:PCCB:STAG1:SLC35G2:NCK1:NAA11:BANK1:SLC39A8:CISD2:BDH2:CENPE:NDST3:HCN1:MEF2C:GPR98:MAN2A1:CTNNA1:RIMS1:FUT9:MIR548AI:…
GWAScatalog	Regular attendance at a religious group	68	30	6.35462e-14	2.81192e-11	KLHL29:AFF3:CHST10:NMS:RHOA:TCTA:AMT:NICN1:DAG1:BSN:APEH:MST1:RNF123:AMIGO3:GMPPB:IP6K1:CDHR4:UBA7:MIR5193:TRAIP:CAMKV:MST1R:MON1A:RBM6:ARHGEF38-IT1:LINC00461:MEF2C:POU3F2:FBXL4:FAXC:C17orf58:TCF4
GWAScatalog	Autism spectrum disorder or schizophrenia	405	87	1.36159e-13	5.47729e-11	PTPRF:KDM4A:ST3GAL3:ARTN:IPO13:DPH2:ATP6V0B:B4GALT2:CCDC24:SLC6A9:DPYD:DPYD-AS2:MIR137HG:FANCL:GIGYF2:KCNJ13:NGEF:GHRL:ALAS1:TLR9:TWF2:PPM1M:MIRLET7G:GLYCTK:SEMA3G:NT5DC2:PBRM1:ITIH4:FHIT:FOXP1:MIR1284:PPP2R3A:MSL2:PCCB:STAG1:SLC35G2:NCK1:IL20RB:BANK1:SLC39A8:HCN1:MEF2C-AS1:MAN2A1:RGL2:RIMS1:MAD1L1:MIR4655:NUDT1:SNX8:LRRN3:MMP16:MIR1234:ATG13:ARHGAP1:CKAP5:MIR5582:SNORD67:LRP4-AS1:LRP4:ARFGAP2:PA…
GWAScatalog	Household income (MTAG)	141	44	3.30993e-13	1.22054e-10	PTPRF:KDM4A:ST3GAL3:AK5:DPYD:BCL11A:AFF3:LINC01104:CHST10:NMS:LRP1B:ERBB4:VWC2L:USP4:GPX1:RHOA:TCTA:BSN:RNF123:IP6K1:TRAIP:CAMKV:MON1A:RBM6:SEMA3F:FOXP1:CADM2:ROPN1:LINC00461:MEF2C:EFNA5:THSD7A:CALN1:FOXP2:LRRC14:BRINP1:CAMK1D:PITPNM2:PRKD1:SEMA6D:SGSM2:DCC:TCF4:CDH4
GWAScatalog	Bipolar I disorder	82	32	5.85253e-13	1.99211e-10	CADM2:TFAP2D:TFAP2B:PLEC:MIR661:PARP10:GRINA:SPATC1:OPLAH:MYRF:TMEM258:MIR611:FEN1:FADS2:FADS1:MIR1908:FADS3:RFXANK:NR2C2AP:NCAN:HAPLN4:TM6SF2:SUGP1:MAU2:GATAD2A:TSSK6:NDUFA13:YJEFN3:CILP2:PBX4:LPAR2:GMIP:ATP13A1
GWAScatalog	Adult body size	481	96	7.93446e-13	2.50786e-10	USP33:DNAJB4:PTBP2:DPYD:TMEM18:FANCL:BCL11A:CTNNA2:AFF3:POU3F3:LRP1B:ZEB2:CIR1:LANCL1:ERBB4:SEC22C:TOPAZ1:MST1R:IQCF3:ERC2:FHIT:FOXP1:CADM2:C3orf38:EPHB1:SLC35G2:RSRC1:ANTXR2:PPP3CA:SLC39A8:INPP4B:SLC10A7:IRX1:NIM1K:CCNH:TMEM161B:MEF2C:NR2F1:EFNA5:FBXL17:TFAP2B:PKHD1:EPHA7:HIVEP2:MAD1L1:AUTS2:PPP1R3A:FOXP2:CNGB3:RUNX1T1:PTPRD:TYRP1:NFIB:TRPM3:TLR4:CELF2:RSU1:CRTAC1:ENO4:CHID1:BDNF:KCNA4:ARL14EP:N…
GWAScatalog	Number of sexual partners	93	34	1.01946e-12	3.0074e-10	KDM4A:PTBP2:KLHL29:BCL11A:LRRTM4:LRP1B:GRB14:FOXP1:CADM2:VGLL3:SPTSSB:HCN1:TMEM161B:MEF2C:NUDT12:MAN2A1:POU3F2:MAD1L1:FOXP2:MDFIC:TFEC:RUNX1T1:METTL15:PMCH:FOXG1:EIF5:SEMA6D:XYLT1:SGSM2:C17orf58:RIT2:DCC:TCF4:KCNG2
GWAScatalog	Intelligence (MTAG)	228	58	1.19369e-12	3.30131e-10	PTPRF:ST3GAL3:DPYD:BCL11A:TSGA10:AFF3:LINC01104:CHST10:GPD2:DPP4:BMPR2:ERBB4:NCKIPSD:USP4:GPX1:NICN1:DAG1:BSN:IP6K1:TRAIP:CAMKV:MON1A:RBM6:SEMA3F:CACNA2D2:NT5DC2:PBRM1:FOXP1:CADM2:CCDC14:GRID2:BANK1:SLC39A8:LINC00461:MEF2C:MEF2C-AS1:MIR3660:FBXL17:MAN2A1:CALN1:WRN:RMDN1:CPNE3:RUNX1T1:LRRC14:NPM3:SORCS3:SYT7:PITPNM2:MPHOSPH9:CDK2AP1:PRKD1:AKAP6:KCNH5:HSF5:DCC:CKM:PHACTR3
GWAScatalog	Regular attendance at a gym or sports club	32	19	2.93109e-12	7.62945e-10	THSD7B:BSN:APEH:MST1:RNF123:AMIGO3:GMPPB:IP6K1:CDHR4:UBA7:MIR5193:TRAIP:CAMKV:MST1R:MON1A:RBM6:RBM5:SEMA3F:CADM2:MIR5688:TCF4
GWAScatalog	Age at first birth	78	30	4.78886e-12	1.17726e-09	ST3GAL3:GIPC2:AFF3:LINC01104:RNF123:CAMKV:MST1R:MON1A:RBM6:RBM5:SEMA3F:HYAL3:DOCK3:CADM2:MRPS30:HCN1:HIVEP2:CALN1:FOXP2:PPP1R16A:GPT:RECQL4:FREM1:SORCS3:VAX1:KIF18A:TRAF3:LINC00669:TCF4:ADARB1
GWAScatalog	Subcortical volume (MOSTest)	522	99	8.16772e-12	1.90222e-09	MINOS1-NBL1:NBL1:C1orf210:TIE1:MPL:CDC20:MED8:SZT2:HYI:CCDC17:FAF1:WLS:DENND1B:FANCL:BCL11A:FAHD2B:TMEM131:POU3F3:DPP4:COL5A2:FAM117B:ICA1L:WDR12:CARF:NBEAL1:CYP20A1:ABI2:MAP2:EPHA4:CCDC51:TMA7:ATRIP:TREX1:TMEM89:CELSR3:NCKIPSD:PRKAR2A:SLC25A20:ARIH2:P4HTM:WDR6:DALRD3:NDUFAF3:IMPDH2:QRICH1:USP19:LAMB2:CCDC71:KLHDC8B:C3orf84:USP4:GPX1:RHOA:TCTA:AMT:NICN1:DAG1:BSN:APEH:MST1:RNF123:AMIGO3:GMPPB:IP6K…
GWAScatalog	Depressive symptoms (binary sum-score)	16	13	1.81833e-11	4.02306e-09	AMT:NICN1:RNF123:RBM6:LSMEM2:HYAL1:CYB561D2:CACNA2D2:C3orf18:HEMK1:MAPKAPK3:DOCK3:MANF
GWAScatalog	Educational attainment	59	25	2.30833e-11	4.73748e-09	PTPRF:NMS:CAMKV:CADM2:POU3F2:SCRT1:VPS28:KIFC2:FOXH1:PPP1R16A:GPT:MFSD3:RECQL4:LRRC14:LRRC24:ARHGAP39:PITPNM2:MPHOSPH9:SBNO1:RILPL2:SNRNP35:RILPL1:TMED2:IFNGR2:ITSN1
GWAScatalog	Refractive error	1389	205	2.35536e-11	4.73748e-09	CAMK2N1:SZT2:PTPRF:KDM4A:ST3GAL3:SLC6A9:KLF17:VAV3:GOLPH3L:PTPRC:PSEN2:FAM110C:SH3YL1:ACP1:TMEM18:PXDN:PNPT1:EFEMP1:BCL11A:CTNNA2:ZEB2:GPD2:DYNC1I2:WNT10A:DIS3L2:ECEL1:CHRNG:TIGD1:EIF4E2:EFHD1:RBMS3:EIF1B:ZNF621:CTNNB1:ULK4:CELSR3:ARIH2:QRICH1:USP4:RHOA:NICN1:DAG1:BSN:MST1:RNF123:IP6K1:CDHR4:TRAIP:CAMKV:MST1R:MON1A:RBM6:RBM5:SEMA3F:DOCK3:IQCF1:CHDH:IL17RB:ERC2:CCDC66:ARHGEF3:FHIT:FOXP1:PPP4R2:EBL…
GWAScatalog	Depressive symptom (appetite changes) (binary trait)	10	10	5.22036e-11	9.87409e-09	RBM6:LSMEM2:HYAL1:CYB561D2:CACNA2D2:C3orf18:HEMK1:MAPKAPK3:DOCK3:MANF
GWAScatalog	Lacunar stroke	12	11	5.35544e-11	9.87409e-09	ICA1L:WDR12:CARF:NBEAL1:ULK4:SPI1:SLC39A13:PSMC3:RAPSN:ZCCHC14:EPB41L3
GWAScatalog	Bipolar disorder	509	94	1.23941e-10	2.19376e-08	ST6GALNAC3:PTGFR:ALG14:VAV3:CKS1B:CTNNA2:TMEM131:MGAT4A:TSGA10:C2ORF15:LIPT1:MITD1:MRPL30:LYG1:TXNDC9:REV1:MAP2:NGEF:RBMS3:VIPR1:ZNF35:ZNF502:ALAS1:TLR9:TWF2:PPM1M:GLYCTK:SEMA3G:NT5DC2:PBRM1:ITIH4:CADM2:IL12A:RP11-432B6.3:IFT80:SMC4:MIR15B:MIR16-2:TRIM59:KPNA4:SCARNA7:ADCY2:CKS1B:TFAP2D:TFAP2B:RIMS1:MIR2113:POU3F2:ROS1:DCBLD1:HIVEP2:MAD1L1:THSD7A:AUTS2:MMP16:PLEC:MIR661:PARP10:GRINA:SPATC1:OPLAH:…
GWAScatalog	Mood instability	52	22	3.77208e-10	6.4198e-08	LRP1B:NDUFAF3:LAMB2:GPX1:RHOA:NICN1:DAG1:BSN:AMIGO3:GMPPB:EPHB1:HIVEP2:PTPRD:SORCS3:LRP4:NR1H3:RAPSN:NDUFS3:PTPMT1:KBTBD4:MTCH2:DCC:TCF4
GWAScatalog	General cognitive ability	171	44	4.08903e-10	6.70147e-08	CAMK2N1:PTPRF:ST3GAL3:BCL11A:AFF3:LINC01104:GPD2:DPP4:KCNH7:RHOA:NICN1:BSN:IP6K1:CDHR4:CAMKV:RBM6:SEMA3F:GNAT1:TLR9:NT5DC2:PBRM1:FOXP1:CADM2:MYLK:KALRN:BANK1:SLC39A8:LINC00461:MEF2C:MEF2C-AS1:AUTS2:CALN1:FOXH1:RECQL4:CPN1:ERLIN1:MTCH2:PRKD1:AKAP6:CDH8:HSF5:DCC:PHACTR3:CDH4
GWAScatalog	Age at first sexual intercourse	193	47	7.70444e-10	1.21758e-07	ST3GAL3:FUBP1:PTBP2:NEK7:TMEM18:FANCL:MIR4432:BCL11A:ERBB4:KCNH8:RHOA:SEMA3F:CACNA2D3:FHIT:FOXP1:CADM2:RP11-331K15.1:C3orf38:LSAMP:CCSER1:HCN1:LINC00461:EFNA5:TFAP2D:FBXO9:MAD1L1:FOXP2:MET:SMIM19:CNGB3:PTPRD:CELF2:SORCS3:KIAA1598:ATG13:SOX5:DUSP6:AKAP6:SEMA6D:ZNF521:LINC00669:RP11-142I20.1:RIT2:DCC:TCF4:KCNG2:TSHZ2
GWAScatalog	Anorexia nervosa	153	40	1.51965e-09	2.31877e-07	SZT2:HYI:PTPRF:KDM4A:NR4A2:SPAG16:VWC2L:NGEF:TOPAZ1:TCAIM:ITIH4:STAG1:RSRC1:NAA11:SLC39A8:HCN1:TMEM161B:MEF2C:TFAP2D:TFAP2B:RIMS1:MAD1L1:SORCS3:FOLH1:FADS2:FADS3:IGSF9B:SOX5:PITPNM2:MPHOSPH9:AKAP6:NPAS3:RTN1:SYNE2:BCL11B:BAG5:DCC:TCF4:LPAR2:GMIP
GWAScatalog	Neuroticism	119	34	2.10841e-09	3.05935e-07	VWC2L:ENTPD3:ZNF621:SHOX2:RSRC1:NXPH1:TMEM106B:FOXP2:TYRP1:TLR4:EMX2:DDB2:ACP2:NR1H3:MADD:MYBPC3:SPI1:SLC39A13:PSMC3:RAPSN:CELF1:NDUFS3:PTPMT1:KBTBD4:FAM180B:C1QTNF4:MTCH2:AGBL2:FNBP4:NUP160:SEMA6D:ZCCHC14:PAFAH1B1:PRKCA
GWAScatalog	Smoking status (ever vs never smokers)	167	42	2.14327e-09	3.05935e-07	KDM4A:RWDD3:PTBP2:TMEM18:FANCL:BCL11A:LRRTM1:DDX18:THSD7B:ZEB2:DPP4:OLA1:CHDH:CADM2:VGLL3:GK2:TTC29:MEF2C:NUDT12:EFNA5:FBXL17:TFAP2B:EPHA7:POU3F2:PSMG3:MAD1L1:MDFIC:RUNX1T1:TYRP1:RMI1:SLC28A3:BRINP1:GATA3:BDNF:METTL15:FOXG1:SEMA6D:IGF1R:SMG6:DCC:KCNG2:RIN2
GWAScatalog	Depressive symptoms (sum-score)	12	10	2.8848e-09	3.98914e-07	RBM6:LSMEM2:HYAL1:CYB561D2:CACNA2D2:C3orf18:HEMK1:MAPKAPK3:DOCK3:MANF
GWAScatalog	Extremely high intelligence	72	25	3.46816e-09	4.65049e-07	DPYD:AFF3:CHST10:GPX1:RHOA:TCTA:AMT:NICN1:DAG1:BSN:APEH:MST1:RNF123:AMIGO3:GMPPB:IP6K1:CDHR4:TRAIP:CAMKV:MST1R:MON1A:RBM6:RBM5:SEMA3F:GNAT1:CKB
GWAScatalog	Loneliness (MTAG)	63	23	4.7948e-09	6.24029e-07	ERBB4:TRPM6:C9orf40:NMRK1:OSTF1:MADD:MYBPC3:SPI1:SLC39A13:PSMC3:RAPSN:CELF1:NDUFS3:PTPMT1:KBTBD4:FAM180B:C1QTNF4:MTCH2:AGBL2:FNBP4:NUP160:C17orf58:TCF4
GWAScatalog	Loneliness	91	27	3.88965e-08	4.91763e-06	ERBB4:RAB9BP1:PTPRD:TRPM6:C9orf40:NMRK1:OSTF1:PNLIPRP1:PNLIPRP2:MADD:MYBPC3:SPI1:SLC39A13:PSMC3:RAPSN:CELF1:NDUFS3:PTPMT1:KBTBD4:FAM180B:C1QTNF4:MTCH2:AGBL2:FNBP4:NUP160:C17orf58:TCF4
GWAScatalog	Chronotype	480	82	7.05701e-08	8.67424e-06	PIGK:AK5:RWDD3:PTBP2:DPYD:GOLPH3L:LPIN1:FANCL:BCL11A:EVA1A:LRRTM4:CIR1:INO80D:RBM6:CACNA2D2:ERC2:MITF:FOXP1:EIF4E3:ROBO2:CADM2:LSAMP:MED12L:SHOX2:B3GALNT1:NMD3:PAQR3:NAA11:PPP3CA:SLC10A7:RASA1:TMEM161B:MEF2C:EFNA5:TFAP2B:PKHD1:RIMS1:POU3F2:FBXL4:FAXC:ADAT2:AUTS2:CALN1:PPP1R3A:FOXP2:TFEC:TES:WRN:RUNX1T1:TRIQK:PTPRD:TRPM3:ANXA1:RORB:PDZD8:EMX2:LIN7C:BDNF:METTL15:ARL14EP:MADD:ETNK1:SOX5:CLIP1:ZCCHC8…
GWAScatalog	General risk tolerance (MTAG)	224	47	1.13986e-07	1.36321e-05	PTPRF:SNX7:LHX9:ATP6V1G3:KLHL29:BCL11A:POU3F3:LRP1B:ZEB2:MAP2:BARD1:ABHD5:TOPAZ1:SEMA3F:FOXP1:CADM2:VGLL3:STAG1:NAA11:INPP4B:HCN1:CTNNA1:BAI3:POU3F2:AUTS2:FOXP2:MDFIC:TFEC:RUNX1T1:AGTPBP1:GATA3:CELF2:FRAT2:SORCS3:STK32C:BDNF:METTL15:LRP4:NUP37:PRKD1:SEMA6D:PRTG:CDH8:ARHGAP28:PIK3C3:TCF4:TSHZ2
GWAScatalog	Systolic blood pressure	697	108	1.30367e-07	1.51809e-05	ZDHHC18:SF3A3:CCDC30:SZT2:KLHL29:PNPT1:THSD7B:GRB14:COBLL1:OLA1:WIPF1:CPS1:ERBB4:IQSEC1:FGD5:KAT2B:TGFBR2:CTNNB1:ULK4:ARIH2:IP6K1:CACNA2D2:ARHGEF3:MITF:FOXP1:CADM2:MIR5688:C3orf38:RYK:PPP2R3A:PCCB:TSC22D2:TRIM59:SCARNA7:ARL14:SEL1L3:PRDM8:FGF5:BANK1:SLC39A8:LEF1:TTC29:EDNRA:CCNH:TMEM161B:RGMB:FER:CPEB4:TFAP2D:FUT9:SLC35F1:RP3-323P13.2:TCF21:ELFN1:MAD1L1:MIR4648:KRBA1:KANK1:SMARCA2:VLDLR:GLIS3:PTP…
GWAScatalog	Hand grip strength	124	31	3.0259e-07	3.43324e-05	GIPC2:AC093326.1:TMEM18:AFF3:ZEB2:OLA1:CIR1:IP6K1:FOXP1:ROBO2:CGGBP1:ANTXR2:BANK1:SLC39A8:NUDT12:FBXL17:TFAP2D:TFAP2B:MAD1L1:AUTS2:PPP1R3A:CRTAC1:BDNF:CELF1:IGSF9B:KDM2B:KNTC1:CCDC92:SEMA6D:ADPGK:TCF4
GWAScatalog	Cognitive ability	150	35	3.29493e-07	3.64502e-05	DNAJB4:DPYD:PDIA6:BCL11A:LINC01104:LRP1B:ZEB2:RAPGEF4:GIGYF2:RBM6:FOXP1:CADM2:STAG1:SLC39A8:HCN1:LINC00461:MEF2C-AS1:MIR3660:EFNA5:FBXL17:FUT9:MAD1L1:CALN1:FOXP2:NFIB:CAMK1D:ERLIN1:SORCS3:IGSF9B:MPHOSPH9:PRKD1:AKAP6:SEMA6D:DCC:TCF4
GWAScatalog	Smoking initiation	125	31	3.66544e-07	3.956e-05	PTPRF:TMEM18:THSD7B:TEX41:SEMA3F:FOXP1:CADM2:LINC00901:GRID2:TTC29:EDNRA:TMEM161B:LINC00461:NUDT12:RAB9BP1:MIR2113:POU3F2:ELFN1:MAD1L1:AUTS2:NAA38:RUNX1T1:KIAA0020:PTPRD:RMI1:BDNF:SPATS2:SEMA6D:XYLT1:SMG6:DCC
GWAScatalog	Intraocular pressure	343	62	3.75853e-07	3.95988e-05	DNALI1:RSPO1:PTCH2:PNPT1:EFEMP1:AFF3:TEX41:SEMA3F:RP11-460N16.1:FOXP1:CADM2:KALRN:PPP2R3A:STAG1:TSC22D2:EMCN:PITX2:FBXL17:FER:MIR548F3:TFAP2B:PKHD1:THSD7A:TFEC:TES:CAV2:CAV1:NAA38:GLIS3:LINC00583:KAZALD1:SLC25A22:METTL15:LRP4:NR1H3:MYBPC3:SPI1:PSMC3:RAPSN:NUP160:PTPRJ:OR4A47:TRIM49B:OR4C13:OR4A5:FAM186A:LUM:DCN:IGF1:LINC00485:LMO7:NPAS3:SPTSSA:FBN1:PRTG:NEDD4:MAPK8IP3:SMG6:RP1-62O9.3:ZNF652:TCF4:…
GWAScatalog	Feeling miserable	28	13	4.11247e-07	4.23202e-05	KLHL29:FANCL:TMA7:MST1:LSAMP:ELFN1:SORCS3:LIN7C:ARHGAP1:DDB2:ACP2:NR1H3:DCC
GWAScatalog	Risk-taking tendency (4-domain principal component model)	84	24	4.73374e-07	4.76063e-05	BCL11A:LRRTM4:THSD7B:ZEB2:ITIH4:FOXP1:CADM2:VGLL3:SLC39A8:NUDT12:CPEB4:POU3F2:MAD1L1:MDFIC:RUNX1T1:TYRP1:RMI1:BDNF:METTL15:C1QTNF4:SEMA6D:IGF1R:DCC:TCF4
GWAScatalog	Gastroesophageal reflux disease	69	21	7.71527e-07	7.58669e-05	DPYD:APOB:LYG1:AFF3:ERBB4:SNRK:ANO10:MON1A:RBM6:FOXP1:SLC39A8:HIVEP2:ELFN1:MAD1L1:FOXP2:SORCS3:TSKU:DCC:C21orf62:OLIG2:ADARB1
GWAScatalog	Morning person	182	38	2.03482e-06	0.000195741	PIGK:AK5:GOLPH3L:NPL:BCL11A:LRRTM4:INO80D:PRKAR2A:ARIH2:RHOA:BSN:RNF123:CAMKV:RBM6:RBM5:SEMA3F:GNAI2:CACNA2D2:DOCK3:ROBO2:PPM1L:B3GALNT1:NMD3:SPTSSB:TMEM161B:MEF2C:POU3F2:WRN:PTPRD:LIN7C:BDNF:ARL14EP:SLC38A1:FBXL3:SCEL:ASB7:PITPNC1:TCF4
GWAScatalog	Neurociticism	85	23	2.30678e-06	0.000217181	BARD1:SLC35G2:SHOX2:TMEM161B:FBXL17:FBXL4:ELFN1:TMEM106B:GLIS3:PTCH1:TLR4:PDZD8:ARHGAP1:DDB2:ACP2:NR1H3:GRM5:IGSF9B:PRKD1:SEMA6D:PAFAH1B1:DCC:TCF4
GWAScatalog	Hip circumference	124	29	3.1011e-06	0.000285882	FAF1:ZZZ3:GIPC2:PTBP2:TMEM18:DPP10:MCM6:GRB14:COBLL1:ARIH2:FHIT:ROBO2:CADM2:LSAMP:CCSER1:NR2F1-AS1:TFAP2B:EYA4:MDFIC:TTC39B:BRINP1:LIN7C:BDNF-AS:BDNF:SLC39A13:CLIP1:CCDC92:RBM26:PRKD1
GWAScatalog	Alcohol use disorder (total score)	28	12	3.29908e-06	0.000297927	SMC4:TRIM59:KPNA4:SCARNA7:ARL14:SLC39A8:SPI1:SLC39A13:PSMC3:RAPSN:CELF1:NDUFS3
GWAScatalog	Global electrical heterogeneity phenotypes	16	9	3.45591e-06	0.000305848	SPI1:SLC39A13:PSMC3:RAPSN:CELF1:AGBL2:FNBP4:NUP160:IGF1R
GWAScatalog	A body shape index	361	61	4.61234e-06	0.000400188	ZZZ3:FUBP1:SH3YL1:EFEMP1:AFF3:GRB14:COBLL1:INO80D:ANO10:ABHD5:NCKIPSD:CCDC71:KLHDC8B:DAG1:BSN:POC1A:TLR9:PBRM1:EPHB1:PCCB:STAG1:TSC22D2:SLC39A8:CPEB4:MMP16:PKD2L1:PNPLA2:SSPN:RAPGEF3:SLC5A8:STAB2:MLXIP:DIABLO:CLIP1:ZCCHC8:KNTC1:HCAR1:HCAR3:CCDC62:HIP1R:VPS37B:ABCB9:PITPNM2:MPHOSPH9:SBNO1:RILPL2:RILPL1:MIR3908:ATP6V0A2:DNAH10:CCDC92:ZNF664:CDC42BPB:RFX7:TEX9:MNS1:ELL:CEBPA:PEPD:TSHZ2:PCBP3
GWAScatalog	Triglyceride levels	540	83	4.99107e-06	0.000424721	PIGV:FAF1:ST6GALNAC5:DPYD:GOLPH3L:C2orf43:APOB:FANCL:AFF3:ZEB2:TEX41:GRB14:COBLL1:CIR1:BMPR2:WNT10A:MITF:VGLL3:LSAMP:PPP2R3A:PCCB:WWTR1:TSC22D2:SLC39A8:NUDT12:PJA2:MAN2A1:PRELID2:CPEB4:RIMS1:EYA4:SLC22A1:PLG:QKI:CALN1:POM121:MET:CAPZA2:NAA38:PTPRD:MPDZ:TTC39B:HNRNPK:MED27:SFTA1P:VIM:CRTAC1:FGFR2:PWWP2B:B4GALNT4:BDNF:DDB2:NR1H3:OR4X1:OR4A47:OR4C13:OR4C12:FADS2:FADS3:ETNK1:SSPN:COL2A1:HCAR1:CCDC92:…
GWAScatalog	Ulcerative colitis	287	51	6.47343e-06	0.000540471	PTPRC:REL:GPD2:CD28:CTLA4:ICOS:HDAC11:CCDC51:TMA7:ATRIP:TREX1:TMEM89:CELSR3:NCKIPSD:PRKAR2A:SLC25A20:ARIH2:P4HTM:WDR6:DALRD3:NDUFAF3:IMPDH2:QRICH1:USP19:LAMB2:CCDC71:KLHDC8B:C3orf84:USP4:GPX1:RHOA:TCTA:AMT:NICN1:DAG1:BSN:APEH:MST1:RNF123:AMIGO3:GMPPB:IP6K1:MST1R:ITIH4:NFKB1:MANBA:SLC16A10:WNT2:INSL6:GPSM1:NKX2-3:SEMA6D:IRF8
GWAScatalog	Depression	72	20	6.71378e-06	0.000550157	DENND1B:NR4A2:GPD2:ERBB4:RSRC1:LINC00461:FBXL4:TMEM106B:VWDE:KIAA0020:ASTN2:SORCS3:GRM5:SOX5:SYNE2:BAG5:PAFAH1B1:LINC00669:DCC:TCF4
GWAScatalog	Attention deficit hyperactivity disorder or cannabis use	5	5	7.26147e-06	0.000584218	PTPRF:SLC6A9:LINC00461:FOXP2:SEMA6D
GWAScatalog	Experiencing mood swings	35	13	8.64482e-06	0.000683095	LSAMP:FBXL17:FBXL4:TMEM106B:TLR4:ARHGAP1:MYBPC3:SPI1:PTPRJ:ORAI1:HOXB2:DCC:TCF4
GWAScatalog	Irritable mood	31	12	1.17087e-05	0.000908965	DPYD:FANCL:CADM2:HCN1:FBXL17:AUTS2:FOXP2:MMP16:TLR4:C9orf171:MYRF:TCF4
GWAScatalog	Adventurousness	127	28	1.49811e-05	0.00113517	TCEA3:PTPRF:LRRC7:LRP1B:ZEB2:GRB14:MAP2:TOPAZ1:FOXP1:CADM2:VGLL3:SLC35G2:BANK1:SLC39A8:HCN1:EPHA7:AUTS2:FOXP2:MDFIC:PTCH1:CELF2:METTL15:BCAT1:PMCH:SLC24A5:CDH8:TCF4:TSHZ2
GWAScatalog	Coronary artery disease	514	78	1.51356e-05	0.00113517	SF3A3:FHL3:DPYD:C2orf43:APOB:AC018742.1:KLHL29:VAMP5:ZEB2:ZEB2-AS1:TEX41:KCNH7:GRB14:WDR12:CARF:NBEAL1:EFHD1:GIGYF2:KCNJ13:FGD5:QRICH1:QARS:RHOA:TCTA:AMT:BSN:MITF:UMPS:MSL2:PCCB:STAG1:SPINK2:PRDM8:FGF5:TTC29:EDNRA:IRX1:CTD-2161F6.3:MIR548F3:RP3-323P13.2:TCF21:SLC2A12:MIR548A2:HIVEP2:PLG:MAD1L1:THSD7A:TMEM106B:VWDE:ASZ1:GEM:NFIB:TTC39B:TRPM3:ANP32B:CDC123:KIAA1217:PKD2L1:WDR11:FGFR2:HTRA1:BDNF-AS:…
GWAScatalog	Body mass index in physically active individuals	64	18	1.58807e-05	0.00116906	ZZZ3:DNAJB4:TMEM18:FHIT:CADM2:SLC39A8:FBXL17:TFAP2B:MIR548AI:ASTN2:TLR4:BDNF:MTCH2:PRKD1:AKAP6:NPAS3:ADPGK:KCTD15
GWAScatalog	Response to (pegylated) interferon in HBeAG-positive hepatitis B	8	6	1.61158e-05	0.00116906	YIPF5:KCTD16:PRELID2:GRXCR2:SH3RF2:PLAC8L1
GWAScatalog	Multisite chronic pain	53	16	1.7557e-05	0.00125306	FAF1:CTNNA2:AFF3:RNF123:AMIGO3:GMPPB:TRAIP:CAMKV:SEMA3F:STAG1:BANK1:SLC39A8:FOXP2:ASTN2:SORCS3:SOX5:DCC
GWAScatalog	Plasma omega-6 polyunsaturated fatty acid levels (arachidonic acid)	19	9	2.14797e-05	0.00150869	SYT7:DAGLA:FEN1:FADS2:FADS3:RAB3IL1:BEST1:SCGB2A1:SCGB2A2
GWAScatalog	Attention deficit hyperactivity disorder	90	22	2.22543e-05	0.00153867	PTPRF:ST3GAL3:LRRC7:BCL11A:SPAG16:SGOL1-AS1:AC107622.1:FHIT:FOXP1:KPNA4:ARL14:ELOVL6:LINC00461:MEF2C:FOXP2:ASTN2:SORCS3:GRM5:SOX5:DUSP6:SPATA7:SEMA6D
GWAScatalog	Body mass index (joint analysis main effects and physical activity interaction)	73	19	3.1062e-05	0.0021146	ZZZ3:DNAJB4:PTBP2:TMEM18:FHIT:CADM2:SLC39A8:FBXL17:TFAP2B:MIR548AI:ASTN2:TLR4:BDNF:MTCH2:PRKD1:AKAP6:NPAS3:ADPGK:KCTD15
GWAScatalog	Serum metabolite ratios in chronic kidney disease	20	9	3.57975e-05	0.00240006	SLC44A5:ACADM:PKD2L1:MYRF:TMEM258:FEN1:FADS2:FADS1:MIR1908:SYNE2
GWAScatalog	Plasma omega-6 polyunsaturated fatty acid levels (dihomo-gamma-linolenic acid)	16	8	3.84289e-05	0.00253803	TLR4:DAGLA:FEN1:FADS2:FADS3:RAB3IL1:BEST1:MOGAT2
GWAScatalog	Alzheimer's disease or HDL levels (pleiotropy)	51	15	4.49208e-05	0.0029092	APOB:EPHA1:LIPC:APOC4-APOC2:APOC4:APOC2:CLPTM1:CLASRP:MARK4:NKPD1:TRAPPC6A:EXOC3L2:CKM:KLC3:ERCC2:VASP
GWAScatalog	Feeling fed-up	25	10	4.53639e-05	0.0029092	KLHL29:FAM117B:ERBB4:BARD1:CADM2:HCN1:TLR4:OR4A5:DCC:TCF4
GWAScatalog	Response to statin therapy	52	15	5.76915e-05	0.00361822	APOB:NR4A2:GPD2:GRB14:COBLL1:LMBRD1:COL19A1:RMI1:SLC28A3:CDK5RAP2:FADS2:FADS3:SOX5:BCAT1:CTCFL
GWAScatalog	General factor of neuroticism	70	18	5.92327e-05	0.00361822	KLHL29:QRICH1:CADM2:LSAMP:PPP2R3A:LINC00461:FBXL17:MAD1L1:TMEM106B:SORCS3:ARFGAP2:MADD:RAPSN:AGBL2:GRM5:SEMA6D:DCC:TCF4
GWAScatalog	Walking pace	70	18	5.92327e-05	0.00361822	BCL11A:TRAIP:MST1R:FOXP1:CGGBP1:PCCB:SLC39A8:TFAP2B:AUTS2:PPP1R3A:CRTAC1:MTCH2:CLIP1:KNTC1:AKAP6:NPAS3:PIK3C3:TCF4
GWAScatalog	Clozapine-induced agranulocytosis	58	16	6.01491e-05	0.00361822	PDZK1IP1:MYBPH:CCDC13:KRBOX1:CYP8B1:ZNF662:MIR548A2:KANSL2:SNORA2A:SNORA2B:CCNT1:CEP290:TMTC3:RFX7:TEX9:MNS1
GWAScatalog	BMI (adjusted for smoking behaviour)	64	17	6.0508e-05	0.00361822	FUBP1:PTBP2:TMEM18:ERBB4:CCDC140:FHIT:CADM2:SLC39A8:TFAP2B:TLR4:BDNF:MTCH2:RBM26:PRKD1:ADPGK:GPR139:KCTD15
GWAScatalog	Palmitoleic acid (16:1n-7) levels	17	8	6.66061e-05	0.00392976	PKD2L1:SCD:WNT8B:SEC31B:NDUFB8:NDUFB8:HIF1AN:FEN1:FADS2
GWAScatalog	Hypothyroidism	47	14	6.86483e-05	0.00394505	MTF1:VAV3:TPO:CTLA4:ICOS:NR3C2:ZDHHC21:XPA:FOXE1:RTKN2:GOT1:NKX2-3:FOXA2:SSTR4
GWAScatalog	BMI in non-smokers	47	14	6.86483e-05	0.00394505	FUBP1:TMEM18:ERBB4:CCDC140:FHIT:CADM2:SLC39A8:TFAP2B:TLR4:BDNF:MTCH2:ADPGK:GPR139:KCTD15
GWAScatalog	Apolipoprotein A1 levels	362	57	7.36131e-05	0.00417613	TCEA3:CCDC17:SH3YL1:APOB:AFF3:COBLL1:DHRS9:FAM117B:CPS1:RBM6:IQCF1:FOXP1:EIF4E3:MSL2:TSC22D2:CCSER1:SLC39A8:CENPE:NNT:PJA2:RFX6:ARG1:PACRG:CYP2W1:TMEM106B:TTC39B:NANS:CRTAC1:ERLIN1:WDR11:SIGIRR:BDNF:MYBPC3:SPI1:OR4C13:OR4C12:FADS2:MOGAT2:ATF1:MLXIP:DENR:CDK2AP1:DNAH10:TRAF3:LIPC:SMG6:NPEPPS:RIT2:MEX3C:ELL:CEBPA:PEPD:APOC4-APOC2:APOC4:IRF2BP1:FOXA2:TSHZ2:PTTG1IP
GWAScatalog	Body mass index (joint analysis main effects and smoking interaction)	65	17	7.4837e-05	0.00419107	FUBP1:PTBP2:TMEM18:ERBB4:CCDC140:FHIT:CADM2:SLC39A8:TFAP2B:TLR4:BDNF:MTCH2:RBM26:PRKD1:ADPGK:GPR139:KCTD15
GWAScatalog	Tourette syndrome	97	22	7.57707e-05	0.00419107	DPP4:ERC2:MIR2113:THSD7A:TMEM106B:OTUD1:MYO7A:INTS4:CCDC62:HIP1R:VPS37B:ABCB9:OGFOD2:ARL6IP4:PITPNM2:MIR4304:MPHOSPH9:CDK2AP1:SBNO1:hsa-mir-8072:RILPL2:XYLT1
GWAScatalog	Response to fenofibrate (LDL cholesterol levels)	4	4	7.7476e-05	0.00423249	MAU2:GATAD2A:PBX4:ATP13A1
GWAScatalog	Asthma (adult onset)	78	19	8.30303e-05	0.0044806	PTPRC:TEX41:SLC25A46:TSLP:MAP3K7:GATA3:SFTA1P:CELF2:MUC2:MYRF:FADS2:FADS3:WNT11:C11orf30:LRRC32:VDR:ZNF652:LRP3:CEBPA
GWAScatalog	Fruit consumption	112	24	9.55455e-05	0.00509384	FANCL:CADM2:FAM172A:TFAP2D:TFAP2B:PKHD1:MYBPC3:SPI1:SLC39A13:PSMC3:RAPSN:CELF1:NDUFS3:PTPMT1:KBTBD4:FAM180B:C1QTNF4:MTCH2:AGBL2:FNBP4:NUP160:GALNT6:SLC4A8:RALGAPA2
GWAScatalog	Household income	32	11	9.72848e-05	0.00512483	ST3GAL3:AFF3:LINC01104:CHST10:NMS:PDCL3:ERBB4:APEH:RNF123:ROPN1:ARAP3
GWAScatalog	Waist-hip index	518	75	0.000104997	0.005466	FUBP1:EFEMP1:FANCL:AFF3:GRB14:COBLL1:CYBRD1:ANO10:ABHD5:NCKIPSD:PRKAR2A:CCDC71:BSN:TLR9:NT5DC2:PBRM1:ITIH4:MITF:TSC22D2:SLC39A8:IRX1:SH3PXD2B:CPEB4:EYA4:WNT2:ASZ1:MMP16:ASTN2:RTKN2:EMX2OS:PNPLA2:RAPSN:SCGB1D4:MTA2:WDR74:SSPN:RAPGEF3:SLC5A8:PARPBP:IGF1:MLXIP:B3GNT4:DIABLO:CLIP1:ZCCHC8:KNTC1:HCAR1:HCAR3:CCDC62:HIP1R:VPS37B:ABCB9:PITPNM2:MPHOSPH9:SBNO1:RILPL2:RILPL1:MIR3908:EIF2B1:TCTN2:ATP6V0A2:DNA…
GWAScatalog	Plasma omega-3 polyunsaturated fatty acid levels (alphalinolenic acid)	7	5	0.000129636	0.00662571	DAGLA:FEN1:FADS2:FADS3:RAB3IL1
GWAScatalog	Pulse pressure	582	82	0.000130268	0.00662571	MTF1:INPP5B:SF3A3:FHL3:CCDC30:FAF1:NEK7:ATP6V1G3:APOB:KLHL29:PNPT1:EFEMP1:MIR4432:GRB14:COBLL1:CYBRD1:WIPF1:NBEAL1:CYP20A1:LINC00620:WNT7A:FGD5:ULK4:MITF:FOXP1:PPP4R2:CADM2:MIR5688:ANKUB1:TSC22D2:SHOX2:TRIM59:SCARNA7:ARL14:PRDM8:FGF5:BDH2:TTC29:EDNRA:NNT:CCNH:TMEM161B:FBXL17:FER:BNIP1:FUT9:TCF21:ALDH8A1:AIG1:MET:CAPZA2:ST7-AS1:GEM:PTPRD:RABGAP1:CELF2:CDC123:SORCS3:POLR2L:CKAP5:MYBPC3:MTCH2:AGBL2:…
GWAScatalog	Cognitive ability (MTAG)	50	14	0.000144019	0.00716051	PTPRF:ST3GAL3:BCL11A:AFF3:LINC01104:GPD2:DPP4:CELSR3:FOXP1:MEF2C:LRRC14:MED27:SORCS3:DCC
GWAScatalog	Adiponectin levels	50	14	0.000144019	0.00716051	DALRD3:TSC22D2:FER:BAI3:HIVEP2:WDR11:FGFR2:OR8S1:LALBA:CLIP1:ATP6V0A2:DNAH10:ZNF664:PEPD
GWAScatalog	Serum metabolite levels	332	52	0.000170263	0.00837127	SLC44A5:ACADM:MSH4:ASB17:DPYD:NPL:APOB:RPE:ACADL:CPS1:UGT1A10:UGT1A7:UMPS:RPN1:ELOVL6:SLC16A10:ARG1:SLC22A1:OPLAH:SHARPIN:CRAT:LOXL4:PYROXD2:ABCC2:PKD2L1:SLC18A2:BBOX1:CKAP5:CELF1:PTPMT1:MTCH2:OR4C13:MYRF:TMEM258:FEN1:FADS2:FADS1:MIR1908:ACAD8:SYNE2:GATM:SPATA5L1:C15orf48:LIPC:GOT2:HAPLN4:TM6SF2:MAU2:GATAD2A:PBX4:ZNF101:ZNF14:SLC7A9
GWAScatalog	Glaucoma (primary open-angle)	138	27	0.000183931	0.00894392	RSPO1:PNPT1:EFEMP1:IKZF2:DGKD:ARHGEF3:CADM2:TSC22D2:PITX2:BNIP1:TFAP2B:PKHD1:THSD7A:CAV2:CAV1:NAA38:CELF2:MPP7:MADD:RAPSN:AGBL2:LMO7:C14orf39:SIX6:TCF12:SMG6:NPEPPS
GWAScatalog	Logical memory (immediate recall) in normal cognition	24	9	0.000196905	0.00947069	ZNF251:ZNF34:RPL8:ZNF517:ZNF7:ZNF250:ZNF16:LMF1:RP11-161M6.2:SOX8
GWAScatalog	Plasma omega-3 polyunsaturated fatty acid levels (docosapentaenoic acid)	15	7	0.000207677	0.00988139	DAGLA:FEN1:FADS2:FADS3:RAB3IL1:BEST1:FOXG1
GWAScatalog	Axial length	47	13	0.000282019	0.0132759	SNIP1:DNALI1:GNL2:RSPO1:C1orf109:CDCA8:EPHA10:CHDH:IL17RB:ACTR8:OR4A47:IL23A:CDH4
GWAScatalog	Hippocampal tail volume (corrected for total hippocampal volume)	8	5	0.000318835	0.0146963	FAF1:DPP4:FAM172A:POU5F2:DACT1
GWAScatalog	Major depressive disorder (MTAG)	8	5	0.000318835	0.0146963	FOXP2:METTL15:TRAF3:RP11-142I20.1:PIK3C3
GWAScatalog	Type 2 diabetes	555	77	0.00033158	0.0151262	FAF1:RP4-694A7.4:LRRC7:TMEM18:CCDC85A:FANCL:BCL11A:DDX18:LRP1B:GRB14:COBLL1:IKZF2:DGKD:RBM6:CACNA2D3:EIF4E3:ROBO2:TSC22D2:CISD2:SLC9B2:MRPS30:ANKRD55:RASA1:CETN3:TFAP2B:MIR548AI:ARG1:HIVEP2:QKI:ELFN1:ARL4A:AUTS2:ZNF34:GLIS3:PTPRD:NTRK2:PTCH1:C9orf171:GPSM1:CDC123:CAMK1D:PTF1A:CHUK:WDR11:FGFR2:BDNF:CELF1:LRRC32:CAMKK2:ABCB9:PITPNM2:MPHOSPH9:TBC1D4:PRKD1:AKAP6:TRAF3:MARK3:TCF12:IGF1R:XYLT1:GP2:SRR:…
GWAScatalog	Urinary magnesium-to-creatinine ratio	5	4	0.000358334	0.0161799	TRPM6:C9orf40:NMRK1:OSTF1
GWAScatalog	Thrombin-activatable fibrinolysis inhibitor levels	12	6	0.000381393	0.0168766	TPO:TMEM232:SLC25A46:HCAR1:HCAR3:DENR
GWAScatalog	Plasma omega-6 polyunsaturated fatty acid levels (adrenic acid)	12	6	0.000381393	0.0168766	DAGLA:FEN1:FADS2:FADS3:RAB3IL1:BEST1
GWAScatalog	Plasma omega-6 polyunsaturated fatty acid levels (linoleic acid)	21	8	0.000395698	0.0173363	SYT7:DAGLA:FEN1:FADS2:FADS3:BEST1:SCGB2A1:SCGB1D2
GWAScatalog	Body fat distribution (leg fat ratio)	168	30	0.000440677	0.0191176	CKS1B:EFEMP1:ARIH2:WDR6:DALRD3:IMPDH2:QRICH1:RBM6:PBRM1:CKS1B:HNRNPK:RMI1:SLC39A13:PSMC3:RAPSN:NDUFS3:PTPMT1:KBTBD4:C1QTNF4:LIMA1:LARP4:DIP2B:ATF1:KNTC1:PITPNM2:ZNF652:TM6SF2:GATAD2A:TSSK6:NDUFA13:CILP2
GWAScatalog	PR interval	215	36	0.000457371	0.0196492	EDN2:TEX41:BMPR2:VWC2L:TRAK1:LAMB2:FOXP1:PDZRN3:TSC22D2:FGF5:HCN1:NR2F1:FER:ATP6V0E1:BNIP1:NKX2-5:SLC35F1:TCF21:CAV2:CAV1:PLEC:TRPM3:ASTN2:FGFR2:FADS2:WNT11:SOX5:LINC00477:BCAT1:SSPN:TESC:AKAP6:SYNE2:MARK3:IRF8:PRKCA
GWAScatalog	Metabolite levels	1249	152	0.000486341	0.0206929	EDN2:DMAP1:ACADM:ASB17:SAMD13:DPYD:NTNG1:SLC25A24:NTSR2:LPIN1:APOB:CYP1B1:EFEMP1:PAPOLG:MRPL19:REG3G:REG1A:LRRTM1:AFF3:MRPS9:DDX18:HNMT:NXPH2:DYNC1I2:ITGA6:COL5A2:ICOS:PTH2R:ACADL:LANCL1:CPS1:ERBB4:IKZF2:TRPM8:TGFBR2:SLC25A20:TCTA:CCDC66:FOXP1:EIF4E3:ROBO2:CADM2:VGLL3:KALRN:NMNAT3:EIF2A:PPM1L:GK2:GRID2:SLC39A8:NDST3:PRSS12:INPP4B:OTUD4:POU4F2:MTRR:PLCXD3:LYSMD3:EFNA5:FBXL17:SPOCK1:KCTD16:CCNJL:CP…
GWAScatalog	Phospholipid levels (plasma)	22	8	0.000570897	0.0240592	ALG14:KCNH7:PKD2L1:PNLIPRP2:FADS2:FADS3:LIPC:CDH8
GWAScatalog	Red blood cell fatty acid levels	13	6	0.000652078	0.0267171	DAGLA:FEN1:FADS2:FADS3:RAB3IL1:BEST1
GWAScatalog	Palmitic acid (16:0) levels	13	6	0.000652078	0.0267171	CNN3:ALG14:RWDD3:PTPRD:PKD2L1:SCD
GWAScatalog	Stearic acid (18:0) levels	13	6	0.000652078	0.0267171	CNN3:ALG14:RWDD3:FEN1:FADS2:FADS3
GWAScatalog	Body fat distribution (trunk fat ratio)	180	31	0.000676779	0.0274748	CKS1B:EFEMP1:ARIH2:WDR6:DALRD3:IMPDH2:QRICH1:RBM6:DOCK3:PBRM1:CKS1B:HNRNPK:RMI1:SLC39A13:PSMC3:RAPSN:NDUFS3:PTPMT1:KBTBD4:C1QTNF4:LIMA1:LARP4:DIP2B:ATF1:KNTC1:PITPNM2:ZNF652:TM6SF2:GATAD2A:TSSK6:NDUFA13:CILP2
GWAScatalog	Blood metabolite levels	28	9	0.000736133	0.029354	VPS28:KIFC2:FOXH1:PPP1R16A:MFSD3:LRRC14:ZNF34:RPL8:CRAT
GWAScatalog	Daytime nap	135	25	0.000736337	0.029354	RWDD3:PTBP2:DPYD:SNX7:KLHL29:FANCL:AC007131.1:NRP2:INO80D:KCNH8:TCAIM:CADM2:EFNA5:KCTD16:TRPM3:TLR4:METTL15:FEN1:FADS2:FOXG1:PRKD1:PRKCA:ZNF521:SS18:PCBP3
GWAScatalog	HDL cholesterol	197	33	0.000765012	0.0302248	PIGV:SH3YL1:APOB:COBLL1:CPS1:RBM6:RBM5:STAG1:SLC39A8:TMEM106B:TTC39B:ERLIN1:LRP4:ACP2:NR1H3:MADD:MYRF:FADS2:FADS3:MOGAT2:UVRAG:PRKAG1:SPIC:SBNO1:CCDC92:ZNF664:POLR2M:LIPC:TMC5:PEPD:APOC2:RIN2:PTTG1IP
GWAScatalog	Non-lobar intracerebral hemorrhage (MTAG)	18	7	0.0007976	0.0309861	ST3GAL3:ICA1L:NBEAL1:CYP20A1:CELF1:AGBL2:NUP160
GWAScatalog	Contrast sensitivity	23	8	0.000803798	0.0309861	REG3G:REG1B:REG1A:CTNNA2:SPAG16:NGEF:NEU2:INPP5D
GWAScatalog	Vaccenic acid (18:1n-7) levels	3	3	0.000826297	0.0309861	PKD2L1:SCD:FADS2
GWAScatalog	Childhood absence epilepsy	3	3	0.000826297	0.0309861	FANCL:BCL11A:ZEB2
GWAScatalog	Depressive symptom (depressed mood) (binary trait)	3	3	0.000826297	0.0309861	PRKAR2A:KLHDC8B:AMT
GWAScatalog	Delta-5 desaturase activity response to n3-polyunsaturated fat supplement	3	3	0.000826297	0.0309861	MYRF:FEN1:FADS2
GWAScatalog	Serum metabolite concentrations in chronic kidney disease	72	16	0.000877548	0.0326315	SLC44A5:ACADM:ACADL:CPS1:UGT1A10:UGT1A7:POC1A:OPLAH:MAF1:SLC28A3:NTRK2:PTPRJ:MYRF:TMEM258:FADS2:SYNE2
GWAScatalog	HDL cholesterol levels	512	70	0.000902001	0.0330681	TCEA3:PIGV:SH3YL1:APOB:FANCL:AFF3:NR4A2:GRB14:COBLL1:RAPGEF4:FAM117B:CPS1:RBM6:RBM5:IQCF1:EIF4E3:VGLL3:MSL2:TSC22D2:CCSER1:SLC39A8:CENPE:NUDT12:PJA2:POU3F2:ARG1:HIVEP2:PACRG:TMEM106B:MET:NFIB:TTC39B:KIF27:NANS:NTNG2:VIM:CRTAC1:ERLIN1:PNPLA2:BDNF:LRP4:MYBPC3:OR4C13:OR4C12:FADS2:FADS3:MOGAT2:SSPN:ATF1:SPIC:HCAR1:SBNO1:ZNF664:AKAP6:SYNE2:TRAF3:LIPC:DPEP3:IRF8:RIT2:GNG7:ELL:PEPD:APOC4-APOC2:APOC4:APO…
GWAScatalog	Smoking initiation (ever regular vs never regular)	79	17	0.000904236	0.0330681	PTPRF:TMEM18:BCL11A:THSD7B:DPP4:CADM2:INPP4B:TTC29:EFNA5:EPHA7:POU3F2:RUNX1T1:SLC28A3:BDNF:HEATR5A:SEMA6D:CTDP1
GWAScatalog	Liver enzyme levels (aspartate transaminase)	6	4	0.000994668	0.0360771	ST6GALNAC3:THSD7B:CELF2:GOT1
GWAScatalog	Amyotrophic lateral sclerosis (sporadic)	73	16	0.00102747	0.0366103	ST6GALNAC5:PTH2R:ERBB4:PAX3:TRPM8:IQCF5:INPP4B:NUDT12:KCTD16:MAP3K7:CALN1:SMARCA2:TYRP1:GLRX5:RP11-142I20.1:SSTR4
GWAScatalog	Waist circumference adjusted for body mass index	658	86	0.0010439	0.0366103	SH3YL1:KLHL29:PNPT1:EFEMP1:GRB14:COBLL1:INO80D:DIS3L2:HDAC11:ABHD5:CELSR3:NCKIPSD:QRICH1:LAMB2:CCDC71:DAG1:BSN:MON1A:CACNA2D2:DOCK3:POC1A:TLR9:SEMA3G:NT5DC2:PBRM1:ITIH4:EPHB1:PPP2R3A:STAG1:IL20RB:EMCN:SLC39A8:MEF2C:MEF2C-AS1:FER:CCNJL:CPEB4:EPHA7:GPR126:MMP16:MROH1:KIAA0020:TRPM3:KIF27:PTCH1:CCDC3:PNPLA2:RAPSN:SSPN:ANO6:RAPGEF3:METTL1:LINC00485:CLIP1:ZCCHC8:KNTC1:HCAR1:HCAR3:CCDC62:HIP1R:VPS37B:P…
GWAScatalog	Crohn's disease	506	69	0.0010472	0.0366103	DENND1B:PTPRC:PAPOLG:REL:INPP5D:ATG16L1:SAG:DGKD:USP40:PDCD1:CCDC51:TMA7:ATRIP:TREX1:TMEM89:CELSR3:NCKIPSD:PRKAR2A:SLC25A20:ARIH2:P4HTM:WDR6:DALRD3:NDUFAF3:IMPDH2:QRICH1:USP19:LAMB2:CCDC71:KLHDC8B:C3orf84:USP4:GPX1:RHOA:TCTA:AMT:NICN1:DAG1:BSN:APEH:MST1:RNF123:FOXP1:BANK1:SLC39A8:NFKB1:ANKRD55:CPEB4:TMEM106B:FOXP2:RIPK2:TRPM3:GPSM1:CNNM1:GOT1:NKX2-3:SLC25A28:ENTPD7:CUTC:COX15:MYRF:TMEM258:FEN1:FA…
GWAScatalog	Severe insulin-resistant type 2 diabetes	14	6	0.00105074	0.0366103	TCEA3:GREB1:LPIN1:LANCL1:CRTAC1:KCNG2
GWAScatalog	Cholangiocarcinoma in primary sclerosing cholangitis (time to event)	14	6	0.00105074	0.0366103	CACNA2D2:C3orf18:HEMK1:CISH:MAPKAPK3:DOCK3
GWAScatalog	Regular attendance at a pub or social club	41	11	0.00108031	0.0373466	PTBP2:DPYD:DPYD-AS1:DPP4:MIR2113:MRPL43:SEMA4G:MIR608:LZTS2:PDZD7:KAZALD1
GWAScatalog	Body size at age 10	252	39	0.00130405	0.0447319	DNAJB4:PTBP2:TMEM18:FANCL:BCL11A:LRRTM4:LRP1B:GNAI2:FHIT:ROBO2:CADM2:CGGBP1:BANK1:TMEM161B:NUDT12:TFAP2B:PKHD1:GPR63:POU3F2:NMBR:NTRK2:TLR4:CELF2:MCMBP:BDNF:METTL15:NDUFS3:BCAT1:RBM26:PRKD1:AKAP6:TRAF3:SEMA6D:GP2:SMG6:PITPNC1:PIK3C3:GATAD2A:FOXA2
GWAScatalog	Cognitive ability	36	10	0.00135082	0.0459799	ST3GAL3:BCL11A:AFF3:LINC01104:GPD2:DPP4:MEF2C:MED27:SORCS3:DCC
Positional_gene_sets	chr3p21	224	115	2.49831e-58	7.49494e-56	ANO10:ABHD5:MIR138-1:TOPAZ1:TCAIM:ZNF852:ZKSCAN7:ZNF660:ZNF197:ZNF35:ZNF502:ALS2CL:CCDC51:TMA7:ATRIP:TREX1:TMEM89:CELSR3:MIR4793:NCKIPSD:PRKAR2A:SLC25A20:ARIH2:P4HTM:WDR6:DALRD3:MIR425:NDUFAF3:MIR191:IMPDH2:QRICH1:QARS:USP19:LAMB2:CCDC71:KLHDC8B:C3orf84:CCDC36:C3orf62:MIR4271:USP4:GPX1:RHOA:TCTA:AMT:NICN1:DAG1:BSN-AS2:BSN:APEH:MST1:RNF123:AMIGO3:GMPPB:IP6K1:CDHR4:FAM212A:UBA7:MIR5193:TRAIP:CAMKV:…	http://www.gsea-msigdb.org/gsea/msigdb/human/geneset/chr3p21
Positional_gene_sets	chr1p34	187	73	9.24811e-28	1.38722e-25	MIR4255:MEAF6:SNIP1:DNALI1:GNL2:RSPO1:C1orf109:CDCA8:EPHA10:MANEAL:YRDC:C1orf122:MTF1:INPP5B:SF3A3:FHL3:UTP11L:RRAGC:GJA9:COL9A2:EDN2:FOXJ3:ZMYND12:PPCS:CCDC30:PPIH:YBX1:CLDN19:C1orf50:CCDC23:ERMAP:ZNF691:SLC2A1:SLC2A1-AS1:FAM183A:EBNA1BP2:WDR65:TMEM125:C1orf210:TIE1:MPL:CDC20:ELOVL1:MED8:SZT2:SZT2-AS1:HYI:PTPRF:KDM4A:ST3GAL3:RP11-184I16.4:ARTN:RP11-7O11.3:IPO13:DPH2:ATP6V0B:B4GALT2:CCDC24:SLC6A9…	http://www.gsea-msigdb.org/gsea/msigdb/human/geneset/chr1p34
Positional_gene_sets	chr11p11	84	45	1.33137e-24	1.33137e-22	ATG13:ARHGAP1:CKAP5:MIR5582:SNORD67:LRP4-AS1:LRP4:C11orf49:ARFGAP2:PACSIN3:DDB2:ACP2:NR1H3:MADD:RP11-17G12.3:MYBPC3:SPI1:MIR4487:SLC39A13:PSMC3:RAPSN:CELF1:NDUFS3:PTPMT1:KBTBD4:FAM180B:C1QTNF4:MTCH2:AGBL2:FNBP4:NUP160:PTPRJ:MIR3161:OR4B1:OR4X2:OR4X1:OR4S1:OR4C3:OR4A47:TRIM49B:TRIM64C:RP11-707M1.1:OR4C13:OR4C12:RP11-347H15.5:TRIM64B	http://www.gsea-msigdb.org/gsea/msigdb/human/geneset/chr11p11
Positional_gene_sets	chr5p12	18	18	3.01515e-19	2.26136e-17	CCDC152:SEPP1:CTD-2201E18.3:ANXA2R:AC025171.1:NIM1K:HMGCS1:CCL28:C5orf28:C5orf34:PAIP1:NNT-AS1:NNT:FGF10:FGF10-AS1:RP11-53O19.1:MRPS30:HCN1	http://www.gsea-msigdb.org/gsea/msigdb/human/geneset/chr5p12
Positional_gene_sets	chr10p14	27	22	1.14973e-18	6.89836e-17	LINC00707:SFMBT2:KIN:ATP5C1:TAF3:GATA3-AS1:RP11-379F12.3:GATA3:LINC00708:LINC00709:RP5-933E2.1:SFTA1P:LINC00710:CELF2:CELF2-AS2:CELF2-AS1:ECHDC3:PROSER2:UPF2:SEC61A2:MIR548AK:NUDT5:CDC123	http://www.gsea-msigdb.org/gsea/msigdb/human/geneset/chr10p14
Positional_gene_sets	chr10q24	136	47	6.33757e-16	3.16878e-14	FRAT2:RRP12:AVPI1:ZFYVE27:SFRP5:LINC00866:GOLGA7B:CRTAC1:R3HCC1L:LOXL4:PYROXD2:MIR1287:HPS1:MIR4685:HPSE2:CNNM1:GOT1:RP11-129J12.2:NKX2-3:SLC25A28:ENTPD7:CUTC:COX15:ABCC2:DNMBP:DNMBP-AS1:CPN1:ERLIN1:CHUK:CWF19L1:SNORA12:BLOC1S2:PKD2L1:SCD:WNT8B:SEC31B:NDUFB8:NDUFB8:HIF1AN:FAM178A:MRPL43:SEMA4G:MIR608:C10orf2:LZTS2:PDZD7:KAZALD1:NPM3	http://www.gsea-msigdb.org/gsea/msigdb/human/geneset/chr10q24
Positional_gene_sets	chr3q25	92	36	1.91686e-14	8.21513e-13	TM4SF18:TM4SF4:WWTR1:WWTR1-AS1:COMMD2:ANKUB1:RNF13:PFN2:RP11-167H9.6:RP11-483E7.1:TSC22D2:EIF2A:SELT:FAM194A:MED12L:P2RY14:P2RY12:TMEM14E:SHOX2:RSRC1:GFM1:LXN:SCHIP1:IL12A-AS1:IL12A:LINC01100:C3orf80:RP11-432B6.3:IFT80:SMC4:MIR15B:MIR16-2:TRIM59:KPNA4:SCARNA7:ARL14:PPM1L	http://www.gsea-msigdb.org/gsea/msigdb/human/geneset/chr3q25
Positional_gene_sets	chr13q22	27	19	2.97423e-14	1.11534e-12	TBC1D4:COMMD6:UCHL3:RP11-173B14.5:LMO7:C13orf45:KCTD12:IRG1:CLN5:FBXL3:MYCBP2-AS1:SCEL:SLAIN1:MIR3665:EDNRB-AS1:EDNRB:RNF219-AS1:LINC01069:LINC00446	http://www.gsea-msigdb.org/gsea/msigdb/human/geneset/chr13q22
Positional_gene_sets	chr15q21	102	36	7.55476e-13	2.51825e-11	GATM:SPATA5L1:C15orf48:MIR147B:SLC30A4:HMGN2P46:SQRDL:SEMA6D:RP11-198M11.2:SLC24A5:MYEF2:CTXN2:SLC12A1:DUT:FBN1:CEP152:SECISBP2L:FAM227B:DTWD1:HDC:USP8:RSL24D1:DYX1C1-CCPG1:DYX1C1:PRTG:NEDD4:RFX7:TEX9:MNS1:ZNF280D:TCF12:LINC00926:GCOM1:MYZAP:POLR2M:LIPC:RP11-355N15.1	http://www.gsea-msigdb.org/gsea/msigdb/human/geneset/chr15q21
Positional_gene_sets	chr2q34	20	15	3.64597e-12	1.09379e-10	IDH1-AS1:PTH2R:MAP2:UNC80:RPE:AC007038.7:ACADL:LANCL1:CPS1:ERBB4:MIR4776-2:IKZF2:SPAG16:MIR4438:VWC2L	http://www.gsea-msigdb.org/gsea/msigdb/human/geneset/chr2q34
Positional_gene_sets	chr20p11	76	29	1.36457e-11	3.72156e-10	LINC00851:SEC23B:LINC00493:RP11-379J5.5:LINC00652:RP5-1068E13.7:C20orf78:SCP2D1:RP5-1027G4.3:RIN2:NAA20:CRNKL1:C20orf26:INSM1:RALGAPA2:RP4-777D9.2:XRN2:NKX2-4:NKX2-2:PAX1:RP5-828K20.2:FOXA2:RP4-788L20.3:SSTR4:THBD:CST9L:CST9:CST2:RP5-1100I6.2	http://www.gsea-msigdb.org/gsea/msigdb/human/geneset/chr20p11
Positional_gene_sets	chr8q24	212	50	7.40747e-10	1.85187e-08	C8orf76:KIAA0196:FAM83H:MIR4664:NRBP2:EPPK1:PLEC:MIR661:PARP10:GRINA:SPATC1:OPLAH:CYC1:SHARPIN:MAF1:MROH1:DGAT1:SCRT1:TMEM249:SLC52A2:FBXL6:ADCK5:CPSF1:MIR939:MIR1234:SLC39A4:VPS28:TONSL:AC084125.4:CYHR1:KIFC2:FOXH1:PPP1R16A:GPT:MFSD3:RECQL4:LRRC14:LRRC24:C8orf82:ARHGAP39:ZNF251:ZNF34:RPL8:ZNF517:ZNF7:ZNF250:ZNF16:ZNF252P:ZNF252P-AS1:C8orf33	http://www.gsea-msigdb.org/gsea/msigdb/human/geneset/chr8q24
Positional_gene_sets	chr6q23	68	25	8.72383e-10	2.01319e-08	ARG1:TAAR9:TAAR8:TAAR6:TAAR5:TAAR3:TAAR2:TAAR1:VNN2:SLC18B1:RPS12:SNORD101:SNORD100:SNORA33:LINC00326:EYA4:RP3-323P13.2:RP4-662A9.2:TCF21:TBPL1:SLC2A12:HMGA1P7:ALDH8A1:MIR548A2:AHI1	http://www.gsea-msigdb.org/gsea/msigdb/human/geneset/chr6q23
Positional_gene_sets	chr4q24	30	16	1.3967e-09	2.99292e-08	DDIT4L:RP11-588P8.1:EMCN:EMCN-IT3:PPP3CA:MIR1255A:BANK1:SLC39A8:NFKB1:MANBA:UBE2D3:CISD2:SLC9B2:BDH2:CENPE:ARHGEF38-IT1	http://www.gsea-msigdb.org/gsea/msigdb/human/geneset/chr4q24
Positional_gene_sets	chr1p31	108	32	2.29972e-09	4.59943e-08	GADD45A:WLS:DEPDC1:RP4-694A7.4:LRRC7:LHX8:SLC44A5:ACADM:RABGGTB:SNORD45C:SNORD45A:SNORD45B:MSH4:ASB17:ST6GALNAC3:ST6GALNAC5:PIGK:AK5:ZZZ3:USP33:FAM73A:FUBP1:DNAJB4:GIPC2:PTGFR:ELTD1:RP5-887A10.1:RP5-837I24.2:RP11-170N11.1:RP11-475O6.1:SAMD13:UOX:DNASE2B	http://www.gsea-msigdb.org/gsea/msigdb/human/geneset/chr1p31
Positional_gene_sets	chr2q22	15	11	4.65802e-09	8.73379e-08	THSD7B:HNMT:NXPH2:LRP1B:KYNU:GTDC1:ZEB2:ZEB2-AS1:AC010090.1:TEX41:PABPC1P2	http://www.gsea-msigdb.org/gsea/msigdb/human/geneset/chr2q22
Positional_gene_sets	chr9q21	95	28	2.57311e-08	4.53539e-07	TRPM3:TMEM2:ZFAND5:RP11-151D14.1:ALDH1A1:ANXA1:RP11-171A24.2:RORB:TRPM6:C9orf40:RP11-197P3.4:C9orf41:NMRK1:OSTF1:IDNK:UBQLN1:KIF27:C9orf64:HNRNPK:MIR7-1:RMI1:RP11-158D2.2:SLC28A3:NTRK2:AGTPBP1:NAA35:GOLM1:ISCA1	http://www.gsea-msigdb.org/gsea/msigdb/human/geneset/chr9q21
Positional_gene_sets	chr12q13	298	59	2.72123e-08	4.53539e-07	SLC38A1:PCED1B:RPAP3:ENDOU:RAPGEF3:VDR:TMEM106C:COL2A1:SENP1:PFKM:ASB8:C12orf68:OR10AD1:H1FNT:ZNF641:ANP32D:C12orf54:OR8S1:LALBA:KANSL2:SNORA34:SNORA2A:SNORA2B:CCNT1:ARF3:WNT10B:PRKAG1:RHEBL1:SPATS2:NCKAP5L:BCDIN3D-AS1:AQP2:RP11-469H8.6:AQP5:ASIC1:COX14:CERS5:LIMA1:FAM186A:LARP4:DIP2B:ATF1:TMPRSS12:METTL7A:HIGD1C:SLC11A2:LETMD1:CSRNP2:TFCP2:POU6F1:DAZAP2:SMAGP:BIN2:CELA1:GALNT6:SLC4A8:ANKRD33:GRA…	http://www.gsea-msigdb.org/gsea/msigdb/human/geneset/chr12q13
Positional_gene_sets	chr10q25	69	23	3.51866e-08	5.55578e-07	COL17A1:MIR4482-1:GSTO2:CCDC147-AS1:RP11-127O4.3:SORCS3:SORCS3-AS1:RP11-56I23.1:SORCS1:VWA2:ABLIM1:RP11-106M7.1:TRUB1:PNLIPRP3:PNLIPRP1:PNLIPRP2:C10orf82:ENO4:KIAA1598:VAX1:MIR3663:KCNK18:SLC18A2	http://www.gsea-msigdb.org/gsea/msigdb/human/geneset/chr10q25
Positional_gene_sets	chr5q21	24	13	3.93186e-08	5.89778e-07	SLCO4C1:C5orf30:CTD-2193G5.1:NUDT12:RAB9BP1:EFNA5:FBXL17:LINC01023:FER:CTD-2587M2.1:PJA2:MAN2A1:PGAM5P1	http://www.gsea-msigdb.org/gsea/msigdb/human/geneset/chr5q21
Positional_gene_sets	chr2p25	75	24	4.37674e-08	6.25248e-07	FAM110C:SH3YL1:ACP1:FAM150B:AC093326.1:AC093326.2:TMEM18:TPO:PXDN:ODC1:PDIA6:RP11-245G13.2:KCNF1:C2orf50:PQLC3:ROCK2:LINC00570:E2F6:GREB1:MIR4429:NTSR2:LPIN1:AC106875.1:MIR548S	http://www.gsea-msigdb.org/gsea/msigdb/human/geneset/chr2p25
Positional_gene_sets	chr9p23	7	7	6.37114e-08	8.68792e-07	PTPRD:RP11-87N24.2:TYRP1:LURAP1L:MPDZ:RP11-536O18.2:LINC00583	http://www.gsea-msigdb.org/gsea/msigdb/human/geneset/chr9p23
Positional_gene_sets	chr2p12	18	11	8.30833e-08	1.0837e-06	EVA1A:MRPL19:LRRTM4:REG3G:REG1B:REG1A:REG3A:CTNNA2:LRRTM1:AC012075.2:AC098817.5	http://www.gsea-msigdb.org/gsea/msigdb/human/geneset/chr2p12
Positional_gene_sets	chr3p12	20	11	3.66911e-07	4.422e-06	LINC00960:ZNF717:MIR4273:ROBO2:MIR3923:CADM2:MIR5688:CADM2-AS2:CADM2-AS1:RP11-331K15.1:VGLL3	http://www.gsea-msigdb.org/gsea/msigdb/human/geneset/chr3p12
Positional_gene_sets	chr1p21	61	20	3.685e-07	4.422e-06	CNN3:RP4-639F20.1:ALG14:RP11-313A24.1:RP11-57H12.3:RWDD3:RP4-586O15.1:RP11-14O19.1:RP4-617C6.1:RP11-286B14.1:RP5-898J17.1:PTBP2:DPYD:DPYD-AS1:DPYD-AS2:MIR137HG:RP5-1070A16.1:SNX7:LPPR5:RP5-896L10.1	http://www.gsea-msigdb.org/gsea/msigdb/human/geneset/chr1p21
Positional_gene_sets	chr3p11	8	7	4.67942e-07	5.39933e-06	MIR4795:CHMP2B:POU1F1:HTR1F:CGGBP1:ZNF654:C3orf38	http://www.gsea-msigdb.org/gsea/msigdb/human/geneset/chr3p11
Positional_gene_sets	chr9q33	98	26	7.83719e-07	8.70799e-06	ASTN2:SNORA70C:RP11-500B12.1:TLR4:BRINP1:MIR147A:CDK5RAP2:MIR4478:NDUFA8:MORN5:LHX6:RBM18:MRRF:OR1J1:OR1J2:OR1Q1:OR1B1:OR1L4:OR1L6:PDCL:OR1K1:RC3H2:SNORD90:ZBTB6:ZBTB26:RABGAP1	http://www.gsea-msigdb.org/gsea/msigdb/human/geneset/chr9q33
Positional_gene_sets	chr2q11	77	22	1.40532e-06	1.5057e-05	FAHD2A:FAHD2CP:FAHD2B:TMEM131:CNGA3:COA5:UNC50:MGAT4A:KIAA1211L:TSGA10:C2ORF15:LIPT1:MITD1:MRPL30:LYG1:TXNDC9:REV1:AFF3:LINC01104:CHST10:NMS:PDCL3	http://www.gsea-msigdb.org/gsea/msigdb/human/geneset/chr2q11
Positional_gene_sets	chr11p14	23	11	2.26182e-06	2.33982e-05	MUC15:BBOX1:CCDC34:LIN7C:BDNF-AS:BDNF:KIF18A:MIR610:METTL15:KCNA4:ARL14EP	http://www.gsea-msigdb.org/gsea/msigdb/human/geneset/chr11p14
Positional_gene_sets	chr11q12	205	41	2.60859e-06	2.60859e-05	TMEM109:TMEM132A:CD5:DDB1:DAK:CYB561A3:TMEM138:TMEM216:CPSF7:RP11-286N22.8:SDHAF2:PPP1R32:MIR4488:LRRC10B:SYT7:RP11-855O10.2:RPLP0P2:DAGLA:RP11-467L20.10:MYRF:TMEM258:MIR611:FEN1:FADS2:FADS1:MIR1908:FADS3:RAB3IL1:BEST1:RP11-810P12.5:SCGB2A1:SCGB1D2:SCGB2A2:SCGB1D4:MTA2:B3GAT3:INTS5:C11orf48:METTL12:SNORA57:C11orf83:BSCL2:WDR74	http://www.gsea-msigdb.org/gsea/msigdb/human/geneset/chr11q12
Positional_gene_sets	chr7q31	75	21	3.46309e-06	3.35138e-05	LRRN3:AC002463.3:PPP1R3A:FOXP2:MIR3666:MDFIC:RP11-458K10.2:TFEC:TES:CAV2:CAV1:AC006159.4:MET:CAPZA2:ST7-AS1:ST7:WNT2:ASZ1:NAA38:ANKRD7:SPAM1	http://www.gsea-msigdb.org/gsea/msigdb/human/geneset/chr7q31
Positional_gene_sets	chr3p13	17	9	6.7296e-06	6.309e-05	MITF:RP11-460N16.1:FOXP1:MIR1284:EIF4E3:PPP4R2:EBLN2:PDZRN3:PDZRN3-AS1	http://www.gsea-msigdb.org/gsea/msigdb/human/geneset/chr3p13
Positional_gene_sets	chr3p22	85	22	8.35841e-06	7.59856e-05	OSBPL10:EIF1B:ENTPD3:ZNF621:CTNNB1:ULK4:TRAK1:VIPR1:SEC22C:SS18L2:NKTR:CCDC13:CCDC13-AS1:RP11-70C1.1:ACKR2:KRBOX1:CYP8B1:ZNF662:FAM198A:POMGNT2:SNRK:SNRK-AS1	http://www.gsea-msigdb.org/gsea/msigdb/human/geneset/chr3p22
Positional_gene_sets	chr5q14	62	18	9.78406e-06	8.63299e-05	COX7C:MIR4280:RASA1:CCNH:TMEM161B:TMEM161B-AS1:CTC-498M16.2:LINC00461:MEF2C:MEF2C-AS1:MIR3660:RP11-61G23.1:CETN3:MBLAC2:POLR3G:LYSMD3:GPR98:ARRDC3	http://www.gsea-msigdb.org/gsea/msigdb/human/geneset/chr5q14
Positional_gene_sets	chr10p13	36	13	1.23708e-05	0.000106036	CAMK1D:MIR4480:MIR548Q:CCDC3:OPTN:MCM10:SEPHS1:C1QL3:RSU1:CUBN:TRDMT1:VIM-AS1:VIM	http://www.gsea-msigdb.org/gsea/msigdb/human/geneset/chr10p13
Positional_gene_sets	chr2p16	48	15	2.01881e-05	0.000168188	PNPT1:EFEMP1:MIR217:MIR216A:MIR216B:AC011306.1:AC007743.1:CCDC85A:FANCL:AC007131.1:MIR4432:BCL11A:PAPOLG:AC010733.4:REL	http://www.gsea-msigdb.org/gsea/msigdb/human/geneset/chr2p16
Positional_gene_sets	chr2q33	96	23	2.07432e-05	0.000168188	TRAK2:TMEM237:ALS2:CDK15:SUMO1:NOP58:SNORD70:SNORD11B:SNORD11:BMPR2:FAM117B:ICA1L:WDR12:CARF:NBEAL1:CYP20A1:ABI2:RAPH1:CD28:CTLA4:ICOS:NRP2:INO80D	http://www.gsea-msigdb.org/gsea/msigdb/human/geneset/chr2q33
Positional_gene_sets	chr17q24	49	15	2.65836e-05	0.000209871	AMZ2P1:GNA13:RGS9:AXIN2:CEP112:PRKCA:RP11-4F22.2:MIR634:CACNG5:CACNG1:HELZ:PITPNC1:NOL11:SNORA38B:C17orf58	http://www.gsea-msigdb.org/gsea/msigdb/human/geneset/chr17q24
Positional_gene_sets	chr6q13	29	10	0.000195828	0.00150546	LMBRD1:COL19A1:COL9A1:RP11-462G2.1:C6orf57:SMAP1:B3GAT2:MIR30C2:MIR30A:RIMS1	http://www.gsea-msigdb.org/gsea/msigdb/human/geneset/chr6q13
Positional_gene_sets	chr14q23	70	17	0.000200729	0.00150546	DACT1:RTN1:C14orf39:SIX6:TRMT5:SLC38A6:RP11-47I22.2:HIF1A-AS1:HIF1A:SNAPC1:SYT16:LINC00643:LINC00644:KCNH5:RHOJ:PPP2R5E:SYNE2	http://www.gsea-msigdb.org/gsea/msigdb/human/geneset/chr14q23
Positional_gene_sets	chr12q24	264	43	0.000254424	0.00186164	TESC:CAMKK2:KDM2B:ORAI1:MLXIP:B3GNT4:DIABLO:VPS33A:CLIP1:ZCCHC8:RSRC2:KNTC1:HCAR1:HCAR3:DENR:CCDC62:HIP1R:VPS37B:ABCB9:OGFOD2:ARL6IP4:PITPNM2:MIR4304:RP11-197N18.7:MPHOSPH9:C12orf65:CDK2AP1:SBNO1:hsa-mir-8072:SETD8:RILPL2:SNRNP35:RILPL1:MIR3908:TMED2:DDX55:EIF2B1:GTF2H3:TCTN2:ATP6V0A2:DNAH10:CCDC92:ZNF664	http://www.gsea-msigdb.org/gsea/msigdb/human/geneset/chr12q24
Positional_gene_sets	chr6p12	80	18	0.000366121	0.00261515	OPN5:MUT:CENPQ:PGK2:DEFB133:DEFB114:DEFB113:DEFB112:RP11-397G17.1:TFAP2D:TFAP2B:PKHD1:MIR206:MIR133B:IL17A:IL17F:MCM3:FBXO9	http://www.gsea-msigdb.org/gsea/msigdb/human/geneset/chr6p12
Positional_gene_sets	chr3p24	43	12	0.000438598	0.00305998	KCNH8:MIR4791:EFHB:RAB5A:KAT2B:SGOL1:SGOL1-AS1:VENTXP7:RBMS3-AS3:RBMS3:AC116035.1:TGFBR2	http://www.gsea-msigdb.org/gsea/msigdb/human/geneset/chr3p24
Positional_gene_sets	chr18q23	22	8	0.000570897	0.00389248	CTDP1:KCNG2:PQLC1:HSBP1L1:TXNL4A:RBFA:RBFADN:ADNP2	http://www.gsea-msigdb.org/gsea/msigdb/human/geneset/chr18q23
Positional_gene_sets	chr6q26	9	5	0.000661779	0.00441186	PLG:PARK2:PACRG:CAHM:QKI	http://www.gsea-msigdb.org/gsea/msigdb/human/geneset/chr6q26
Positional_gene_sets	chr5q15	28	9	0.000736133	0.00480087	NR2F1-AS1:NR2F1:FAM172A:MIR2277:POU5F2:KIAA0825:ANKRD32:GPR150:RGMB	http://www.gsea-msigdb.org/gsea/msigdb/human/geneset/chr5q15
Positional_gene_sets	chr6q24	46	12	0.000853819	0.00544991	NMBR:VTA1:GPR126:RP11-440G9.1:HIVEP2:RP11-439L18.3:AIG1:ADAT2:PEX3:FUCA2:PHACTR2:PLAGL1	http://www.gsea-msigdb.org/gsea/msigdb/human/geneset/chr6q24
Positional_gene_sets	chr6q16	29	9	0.00097927	0.00612044	EPHA7:FUT9:GPR63:RP1-104O17.1:MIR2113:POU3F2:FBXL4:MIR548AI:FAXC	http://www.gsea-msigdb.org/gsea/msigdb/human/geneset/chr6q16
Positional_gene_sets	chr10p12	67	15	0.00115915	0.00709685	ST8SIA6:ST8SIA6-AS1:STAM:SLC39A12-AS1:COMMD3:COMMD3-BMI1:BMI1:SPAG6:PTF1A:OTUD1:KIAA1217:MIR603:ARHGAP21:ENKUR:MPP7	http://www.gsea-msigdb.org/gsea/msigdb/human/geneset/chr10p12
Positional_gene_sets	chr9p24	48	12	0.00128187	0.0076912	KANK1:DMRT1:SMARCA2:VLDLR:KCNV2:KIAA0020:RP11-32F11.2:GLIS3:GLIS3-AS1:SLC1A1:CDC37L1:INSL6	http://www.gsea-msigdb.org/gsea/msigdb/human/geneset/chr9p24
Positional_gene_sets	chr2q31	97	19	0.00154118	0.00906576	DHRS9:CYBRD1:DYNC1I2:ITGA6:AC093818.1:PDK1:RAPGEF4-AS1:RAPGEF4:MLTK:MLK7-AS1:CDCA7:OLA1:AC018470.4:SP9:CIR1:SCRN3:GPR155:WIPF1:MTX2	http://www.gsea-msigdb.org/gsea/msigdb/human/geneset/chr2q31
Positional_gene_sets	chr2q12	37	10	0.00169737	0.00979253	MFSD9:AC068535.3:LINC01102:LINC01103:AC068057.1:LINC01114:LINC01158:POU3F3:MRPS9:AC104655.2	http://www.gsea-msigdb.org/gsea/msigdb/human/geneset/chr2q12
Positional_gene_sets	chr10q26	130	23	0.00219437	0.012421	PDZD8:EMX2OS:EMX2:BAG3:MCMBP:MIR4682:PPAPDC1A:WDR11-AS1:WDR11:FGFR2:MIR3941:ARMS2:HTRA1:C10orf120:CUZD1:FAM24B:RP11-564D11.3:C10orf88:PSTK:DPYSL4:STK32C:PWWP2B:MIR202HG	http://www.gsea-msigdb.org/gsea/msigdb/human/geneset/chr10q26
Positional_gene_sets	chr6q22	67	14	0.0033083	0.0183794	TSPYL4:FAM26F:KPNA5:FAM162B:RFX6:ROS1:GOPC:DCBLD1:SLC35F1:CEP85L:BRD7P3:PLN:ASF1A:MIR3144	http://www.gsea-msigdb.org/gsea/msigdb/human/geneset/chr6q22
Positional_gene_sets	chr2q37	148	24	0.00567787	0.0309702	DIS3L2:ECEL1:CHRNG:TIGD1:EIF4E2:MIR5001:EFHD1:GIGYF2:KCNJ13:C2orf82:NGEF:NEU2:INPP5D:ATG16L1:SCARNA5:SCARNA6:SAG:DGKD:USP40:UGT1A10:UGT1A7:TRPM8:PDCD1:CXXC11	http://www.gsea-msigdb.org/gsea/msigdb/human/geneset/chr2q37
Positional_gene_sets	chr21q21	51	11	0.00681854	0.0365279	USP25:LINC00478:MIR99A:MIRLET7C:MIR125B2:CXADR:TMPRSS15:AL109763.2:MIR548X:LINC00320:USP16	http://www.gsea-msigdb.org/gsea/msigdb/human/geneset/chr21q21
Immunologic_signatures	PATEL_SKIN_OF_BODY_ZOSTAVAX_AGE_70_93YO_VZV_CHALLENGE_6HR_DN	98	24	9.28647e-06	0.0257962	C2orf43:FAHD2A:USP40:ALS2CL:TCTA:MED12L:SHOX2:MIR30C2:DCBLD1:AIG1:KANK1:ANKS6:NDUFA8:NDUFV1:MAP6:TFCP2:DUT:CEP152:LRRC28:COX4I1:CDK5RAP3:RFXANK:SUGP1:EDN3	http://www.gsea-msigdb.org/gsea/msigdb/human/geneset/PATEL_SKIN_OF_BODY_ZOSTAVAX_AGE_70_93YO_VZV_CHALLENGE_6HR_DN
Immunologic_signatures	GSE39820_TGFBETA1_IL6_VS_TGFBETA1_IL6_IL23A_TREATED_CD4_TCELL_UP	194	38	9.88549e-06	0.0257962	CEP85:ZDHHC18:SNIP1:FAM102B:MGAT4A:HNMT:GPD2:DYNC1I2:BMPR2:KAT2B:CTNNB1:CACNA2D2:SLC39A8:NFKB1:BDH2:CENPE:PAIP1:INTS1:POM121:ADAM9:CPNE3:ARHGAP39:ZNF251:PTCH1:HEMGN:PRKRIR:INTS4:BIRC3:ATF1:CELA1:TMED2:BCL11B:C15orf48:WDR81:PAFAH1B1:GNA13:XRN2:ITGB2	http://www.gsea-msigdb.org/gsea/msigdb/human/geneset/GSE39820_TGFBETA1_IL6_VS_TGFBETA1_IL6_IL23A_TREATED_CD4_TCELL_UP
Immunologic_signatures	GSE21670_UNTREATED_VS_TGFB_IL6_TREATED_STAT3_KO_CD4_TCELL_UP	193	37	2.11644e-05	0.036819	STMN1:CKS1B:MPZL1:ODC1:MLTK:BMPR2:CTLA4:SGOL1:IMPDH2:NICN1:TRAIP:CISH:MAPKAPK3:IQCF5:UMPS:SLC39A8:SLC9B2:CKS1B:CTNNA1:PLAGL1:MDFIC:PPP1R16A:TTC39B:MRRF:SEPHS1:BCAT1:SETD8:EGLN3:TRMT5:DYX1C1:CCNB2:CHSY1:IRF8:SLC35B1:METTL4:SS18:DGCR6:POLA1	http://www.gsea-msigdb.org/gsea/msigdb/human/geneset/GSE21670_UNTREATED_VS_TGFB_IL6_TREATED_STAT3_KO_CD4_TCELL_UP
microRNA_targets	MIR548AR_5P	485	74	2.055e-05	0.0110388	MTF1:LRRC7:FAM73A:DNAJB4:DENND1B:PAPOLG:KIAA1841:LRP1B:ZEB2:GPD2:CYBRD1:DYNC1I2:GPR155:FAM117B:CARF:UNC80:ACADL:LANCL1:IKZF2:SEC22C:FAM198A:DUSP7:CACNA2D3:ERC2:C3orf38:LSAMP:HLTF:KPNA4:CCSER1:GRID2:DNAJB14:NFKB1:CISD2:PITX2:AP1AR:C5orf51:SMAD5:YIPF5:PRELID2:MUT:BAI3:GOPC:THSD7A:MDFIC:MMP16:ZDHHC21:ZFAND5:C9orf40:COMMD3-BMI1:BMI1:TRUB1:NUP160:GRM5:SOX5:SENP1:LARP4:DIP2B:TMTC3:IGF1:ZCCHC8:FBXL3:SLA…	http://www.gsea-msigdb.org/gsea/msigdb/human/geneset/MIR548AR_5P
microRNA_targets	ACATTCC_MIR1_MIR206	287	49	2.90423e-05	0.0110388	PDIK1L:SH3BGRL3:USP33:CNN3:NR4A2:GPD2:PAX3:CELSR3:WDR6:BSN:PBRM1:FOXP1:MYLK:RNF13:C5orf51:RASA1:ARRDC3:SMAP1:TSPYL4:SLC35F1:EYA4:HIVEP2:QKI:TFEC:MET:UBQLN1:HNRNPK:ANP32B:ZBTB6:SLC25A22:TSPAN4:LIN7C:BDNF:ATG13:NR1H3:CPSF7:BSCL2:ARF3:IGF1:KDM2B:SEMA6D:ADPGK:MNT:PAFAH1B1:NGFR:SS18:RIT2:MEX3C:POLA1	http://www.gsea-msigdb.org/gsea/msigdb/human/geneset/ACATTCC_MIR1_MIR206
microRNA_targets	MIR548AP_5P_MIR548J_5P	476	72	3.52589e-05	0.0110388	MTF1:LRRC7:FAM73A:DNAJB4:DENND1B:PAPOLG:KIAA1841:LRP1B:ZEB2:GPD2:CYBRD1:DYNC1I2:GPR155:CARF:UNC80:ACADL:LANCL1:IKZF2:SEC22C:FAM198A:DUSP7:CACNA2D3:ERC2:C3orf38:LSAMP:HLTF:KPNA4:CCSER1:GRID2:DNAJB14:NFKB1:CISD2:PITX2:AP1AR:C5orf51:SMAD5:YIPF5:PRELID2:MUT:BAI3:GOPC:THSD7A:MDFIC:MMP16:ZDHHC21:ZFAND5:C9orf40:COMMD3-BMI1:BMI1:TRUB1:NUP160:GRM5:SOX5:SENP1:LARP4:DIP2B:TMTC3:IGF1:ZCCHC8:FBXL3:SLAIN1:BCL2…	http://www.gsea-msigdb.org/gsea/msigdb/human/geneset/MIR548AP_5P_MIR548J_5P
microRNA_targets	MIR548AS_5P	477	72	3.77911e-05	0.0110388	MTF1:LRRC7:FAM73A:DNAJB4:DENND1B:PAPOLG:KIAA1841:LRP1B:ZEB2:GPD2:CYBRD1:DYNC1I2:GPR155:CARF:UNC80:ACADL:LANCL1:IKZF2:SEC22C:FAM198A:DUSP7:CACNA2D3:ERC2:C3orf38:LSAMP:HLTF:KPNA4:CCSER1:GRID2:DNAJB14:NFKB1:CISD2:PITX2:AP1AR:C5orf51:SMAD5:YIPF5:PRELID2:MUT:BAI3:GOPC:THSD7A:MDFIC:MMP16:ZDHHC21:ZFAND5:C9orf40:COMMD3-BMI1:BMI1:TRUB1:NUP160:GRM5:SOX5:SENP1:LARP4:DIP2B:TMTC3:IGF1:ZCCHC8:FBXL3:SLAIN1:BCL2…	http://www.gsea-msigdb.org/gsea/msigdb/human/geneset/MIR548AS_5P
microRNA_targets	MIR548I	477	72	3.77911e-05	0.0110388	MTF1:LRRC7:FAM73A:DNAJB4:DENND1B:PAPOLG:KIAA1841:LRP1B:ZEB2:GPD2:CYBRD1:DYNC1I2:GPR155:CARF:UNC80:ACADL:LANCL1:IKZF2:SEC22C:FAM198A:DUSP7:CACNA2D3:ERC2:C3orf38:LSAMP:HLTF:KPNA4:CCSER1:GRID2:DNAJB14:NFKB1:CISD2:PITX2:AP1AR:C5orf51:SMAD5:YIPF5:PRELID2:MUT:BAI3:GOPC:THSD7A:MDFIC:MMP16:ZDHHC21:ZFAND5:C9orf40:COMMD3-BMI1:BMI1:TRUB1:NUP160:GRM5:SOX5:SENP1:LARP4:DIP2B:TMTC3:IGF1:ZCCHC8:FBXL3:SLAIN1:BCL2…	http://www.gsea-msigdb.org/gsea/msigdb/human/geneset/MIR548I
microRNA_targets	MIR548A_5P	479	72	4.33663e-05	0.0110388	MTF1:LRRC7:FAM73A:DNAJB4:DENND1B:PAPOLG:KIAA1841:LRP1B:ZEB2:GPD2:CYBRD1:DYNC1I2:GPR155:CARF:UNC80:ACADL:LANCL1:IKZF2:SEC22C:FAM198A:DUSP7:CACNA2D3:ERC2:C3orf38:LSAMP:HLTF:KPNA4:CCSER1:GRID2:DNAJB14:NFKB1:CISD2:PITX2:AP1AR:C5orf51:SMAD5:YIPF5:PRELID2:MUT:BAI3:GOPC:THSD7A:MDFIC:MMP16:ZDHHC21:ZFAND5:C9orf40:COMMD3-BMI1:BMI1:TRUB1:NUP160:GRM5:SOX5:SENP1:LARP4:DIP2B:TMTC3:IGF1:ZCCHC8:FBXL3:SLAIN1:BCL2…	http://www.gsea-msigdb.org/gsea/msigdb/human/geneset/MIR548A_5P
microRNA_targets	MIR548AK_MIR548AM_5P_MIR548C_5P_MIR548H_5P_MIR548O_5P_MIR548AU_5P	479	72	4.33663e-05	0.0110388	MTF1:LRRC7:FAM73A:DNAJB4:DENND1B:PAPOLG:KIAA1841:LRP1B:ZEB2:GPD2:CYBRD1:DYNC1I2:GPR155:CARF:UNC80:ACADL:LANCL1:IKZF2:SEC22C:FAM198A:DUSP7:CACNA2D3:ERC2:C3orf38:LSAMP:HLTF:KPNA4:CCSER1:GRID2:DNAJB14:NFKB1:CISD2:PITX2:AP1AR:C5orf51:SMAD5:YIPF5:PRELID2:MUT:BAI3:GOPC:THSD7A:MDFIC:MMP16:ZDHHC21:ZFAND5:C9orf40:COMMD3-BMI1:BMI1:TRUB1:NUP160:GRM5:SOX5:SENP1:LARP4:DIP2B:TMTC3:IGF1:ZCCHC8:FBXL3:SLAIN1:BCL2…	http://www.gsea-msigdb.org/gsea/msigdb/human/geneset/MIR548AK_MIR548AM_5P_MIR548C_5P_MIR548H_5P_MIR548O_5P_MIR548AU_5P
microRNA_targets	MIR548O_5P_MIR548W	479	72	4.33663e-05	0.0110388	MTF1:LRRC7:FAM73A:DNAJB4:DENND1B:PAPOLG:KIAA1841:LRP1B:ZEB2:GPD2:CYBRD1:DYNC1I2:GPR155:CARF:UNC80:ACADL:LANCL1:IKZF2:SEC22C:FAM198A:DUSP7:CACNA2D3:ERC2:C3orf38:LSAMP:HLTF:KPNA4:CCSER1:GRID2:DNAJB14:NFKB1:CISD2:PITX2:AP1AR:C5orf51:SMAD5:YIPF5:PRELID2:MUT:BAI3:GOPC:THSD7A:MDFIC:MMP16:ZDHHC21:ZFAND5:C9orf40:COMMD3-BMI1:BMI1:TRUB1:NUP160:GRM5:SOX5:SENP1:LARP4:DIP2B:TMTC3:IGF1:ZCCHC8:FBXL3:SLAIN1:BCL2…	http://www.gsea-msigdb.org/gsea/msigdb/human/geneset/MIR548O_5P_MIR548W
microRNA_targets	MIR548AB	479	72	4.33663e-05	0.0110388	MTF1:LRRC7:FAM73A:DNAJB4:DENND1B:PAPOLG:KIAA1841:LRP1B:ZEB2:GPD2:CYBRD1:DYNC1I2:GPR155:CARF:UNC80:ACADL:LANCL1:IKZF2:SEC22C:FAM198A:DUSP7:CACNA2D3:ERC2:C3orf38:LSAMP:HLTF:KPNA4:CCSER1:GRID2:DNAJB14:NFKB1:CISD2:PITX2:AP1AR:C5orf51:SMAD5:YIPF5:PRELID2:MUT:BAI3:GOPC:THSD7A:MDFIC:MMP16:ZDHHC21:ZFAND5:C9orf40:COMMD3-BMI1:BMI1:TRUB1:NUP160:GRM5:SOX5:SENP1:LARP4:DIP2B:TMTC3:IGF1:ZCCHC8:FBXL3:SLAIN1:BCL2…	http://www.gsea-msigdb.org/gsea/msigdb/human/geneset/MIR548AB
microRNA_targets	MIR548AD_5P_MIR548AE_5P_MIR548AY_5P_MIR548B_5P_MIR548D_5P	480	72	4.64298e-05	0.0110388	MTF1:LRRC7:FAM73A:DNAJB4:DENND1B:PAPOLG:KIAA1841:LRP1B:ZEB2:GPD2:CYBRD1:DYNC1I2:GPR155:CARF:UNC80:ACADL:LANCL1:IKZF2:SEC22C:FAM198A:DUSP7:CACNA2D3:ERC2:C3orf38:LSAMP:HLTF:KPNA4:CCSER1:GRID2:DNAJB14:NFKB1:CISD2:PITX2:AP1AR:C5orf51:SMAD5:YIPF5:PRELID2:MUT:BAI3:GOPC:THSD7A:MDFIC:MMP16:ZDHHC21:ZFAND5:C9orf40:COMMD3-BMI1:BMI1:TRUB1:NUP160:GRM5:SOX5:SENP1:LARP4:DIP2B:TMTC3:IGF1:ZCCHC8:FBXL3:SLAIN1:BCL2…	http://www.gsea-msigdb.org/gsea/msigdb/human/geneset/MIR548AD_5P_MIR548AE_5P_MIR548AY_5P_MIR548B_5P_MIR548D_5P
microRNA_targets	MIR548BB_5P	482	72	5.31634e-05	0.0110388	MTF1:LRRC7:FAM73A:DNAJB4:DENND1B:PAPOLG:KIAA1841:LRP1B:ZEB2:GPD2:CYBRD1:DYNC1I2:GPR155:CARF:UNC80:ACADL:LANCL1:IKZF2:SEC22C:FAM198A:DUSP7:CACNA2D3:ERC2:C3orf38:LSAMP:HLTF:KPNA4:CCSER1:GRID2:DNAJB14:NFKB1:CISD2:PITX2:AP1AR:C5orf51:SMAD5:YIPF5:PRELID2:MUT:BAI3:GOPC:THSD7A:MDFIC:MMP16:ZDHHC21:ZFAND5:C9orf40:COMMD3-BMI1:BMI1:TRUB1:NUP160:GRM5:SOX5:SENP1:LARP4:DIP2B:TMTC3:IGF1:ZCCHC8:FBXL3:SLAIN1:BCL2…	http://www.gsea-msigdb.org/gsea/msigdb/human/geneset/MIR548BB_5P
microRNA_targets	MIR4729	697	97	5.34663e-05	0.0110388	RRAGC:TIE1:MED8:DEPDC1:AK5:FUBP1:PTGFR:CTBS:RWDD3:PTBP2:VAV3:NEK7:FAM150B:BCL11A:KIAA1841:TMEM131:AFF3:ITGA6:TRAK2:INO80D:ERBB4:KCNH8:KAT2B:TRAK1:POMGNT2:DOCK3:SPATA12:MITF:CADM2:CGGBP1:MSL2:EIF2A:DNAJB14:NFKB1:UBE2D3:SLC10A7:PLCXD3:HMGCS1:PAIP1:HCN1:KIAA0825:FER:PJA2:PLAC8L1:FBXO9:FUT9:QKI:MDFIC:CAV2:MET:TONSL:SLC1A1:ZDHHC21:CER1:FREM1:ZFAND5:AGTPBP1:IARS:SFMBT2:STAM:RTKN2:SLC35G1:ERLIN1:TRUB1:F…	http://www.gsea-msigdb.org/gsea/msigdb/human/geneset/MIR4729
microRNA_targets	MIR570_3P	742	102	5.67198e-05	0.0110388	PDIK1L:YBX1:PTPRF:DNAJB4:GOLPH3L:DENND1B:NEK7:MGAT4A:MRPL30:MCM6:THSD7B:LRP1B:DPP4:COBLL1:XIRP2:COL5A2:TRAK2:SUMO1:FAM117B:ICA1L:WDR12:RAPH1:INO80D:IKZF2:KAT2B:RBMS3:SEC22C:PBRM1:APPL1:EIF4E3:ROBO2:CADM2:CGGBP1:MSL2:P2RY14:KPNA4:PPM1L:BMP3:EMCN:PLCXD3:HMGCS1:CCNH:FAM172A:EFNA5:MAN2A1:SLC25A46:CAMK4:TFAP2B:COL19A1:C6orf57:GPR63:FBXL4:FAXC:TSPYL4:GOPC:SLC35F1:EYA4:QKI:THSD7A:TMEM106B:FOXP2:CAV2:CPN…	http://www.gsea-msigdb.org/gsea/msigdb/human/geneset/MIR570_3P
microRNA_targets	MIR8068	392	61	5.94854e-05	0.0110388	SYF2:MTF1:ST6GALNAC3:ALG14:BCL11A:LRRTM4:TMEM131:POU3F3:ZEB2:NR4A2:PDK1:NBEAL1:ICOS:ERBB4:VWC2L:PAX3:TCAIM:NICN1:BSN:ERC2:VGLL3:HTR1F:TRAT1:ROPN1B:HLTF:H2AFZ:SLC39A8:PLCXD3:MBLAC2:NR2F1:FER:NEURL1B:EPHA7:FUT9:FAXC:KPNA5:EYA4:PHF14:LRRN3:CORO2A:UCK1:RTKN2:SORCS1:SLC18A2:BDNF:MAP6:TP53AIP1:SSPN:IGF1:ATP6V0A2:FOXG1:RTN1:PPP2R5E:BCL11B:SETD3:SEMA6D:FBN1:ACSM3:SPOP:USP14:SYT4	http://www.gsea-msigdb.org/gsea/msigdb/human/geneset/MIR8068
microRNA_targets	AACATTC_MIR4093P	138	28	7.30242e-05	0.0126478	SH3BGRL3:PTPRF:USP33:CTNNA2:NR4A2:GPD2:PAX3:WDR6:PBRM1:FOXP1:CHMP2B:MYLK:SCHIP1:ELOVL4:EYA4:HIVEP2:QKI:TFEC:MET:HNRNPK:ZBTB6:FAM178A:LIN7C:BDNF:IGF1:KCTD12:SEMA6D:MEX3C	http://www.gsea-msigdb.org/gsea/msigdb/human/geneset/AACATTC_MIR4093P
microRNA_targets	MIR548Y	488	72	7.91298e-05	0.0128487	MTF1:LRRC7:FAM73A:DNAJB4:DENND1B:PAPOLG:KIAA1841:LRP1B:ZEB2:GPD2:CYBRD1:DYNC1I2:GPR155:CARF:UNC80:ACADL:LANCL1:IKZF2:SEC22C:FAM198A:DUSP7:CACNA2D3:ERC2:C3orf38:LSAMP:HLTF:KPNA4:CCSER1:GRID2:DNAJB14:NFKB1:CISD2:PITX2:AP1AR:C5orf51:SMAD5:YIPF5:PRELID2:MUT:BAI3:GOPC:THSD7A:MDFIC:MMP16:ZDHHC21:ZFAND5:C9orf40:COMMD3-BMI1:BMI1:TRUB1:NUP160:GRM5:SOX5:SENP1:LARP4:DIP2B:TMTC3:IGF1:ZCCHC8:FBXL3:SLAIN1:BCL2…	http://www.gsea-msigdb.org/gsea/msigdb/human/geneset/MIR548Y
microRNA_targets	MIR548AQ_5P	481	71	8.71099e-05	0.0133124	MTF1:LRRC7:FAM73A:DNAJB4:DENND1B:PAPOLG:KIAA1841:LRP1B:ZEB2:GPD2:CYBRD1:DYNC1I2:GPR155:CARF:UNC80:ACADL:LANCL1:IKZF2:SEC22C:FAM198A:DUSP7:CACNA2D3:ERC2:C3orf38:LSAMP:HLTF:KPNA4:CCSER1:GRID2:DNAJB14:NFKB1:CISD2:PITX2:AP1AR:C5orf51:SMAD5:YIPF5:PRELID2:MUT:BAI3:GOPC:THSD7A:MDFIC:MMP16:ZDHHC21:ZFAND5:C9orf40:COMMD3-BMI1:BMI1:TRUB1:NUP160:GRM5:SOX5:SENP1:LARP4:TMTC3:IGF1:ZCCHC8:FBXL3:SLAIN1:BCL2L2:FOX…	http://www.gsea-msigdb.org/gsea/msigdb/human/geneset/MIR548AQ_5P
microRNA_targets	MIR5696	675	93	0.000109135	0.0157519	GJA9:DEPDC1:FUBP1:PTGFR:CTBS:RWDD3:PTBP2:DPYD:SLC25A24:TPR:NEK7:PAPOLG:KIAA1841:CNGA3:AFF3:LRP1B:GPR155:COL5A2:TRAK2:ERBB4:KCNH8:KAT2B:TRAK1:NKTR:POMGNT2:SPATA12:ROBO2:CADM2:LSAMP:PPP2R3A:MSL2:EIF2A:PPM1L:B3GALNT1:RNF212:FGF5:DNAJB14:UBE2D3:SEC24B:ELOVL6:ARHGAP10:IRX1:PAIP1:HCN1:LYSMD3:PJA2:SMAD5:LARS:BAI3:MAP3K7:PHACTR2:QKI:THSD7A:TFEC:MET:WNT2:TDRP:GLIS3:ZFAND5:IDNK:NET1:SFMBT2:STAM:ARHGAP21:RT…	http://www.gsea-msigdb.org/gsea/msigdb/human/geneset/MIR5696
microRNA_targets	TAGCTTT_MIR9	228	39	0.000173122	0.0236722	TARDBP:LRRTM1:AFF3:PDK1:KAT2B:NCKIPSD:GNAI2:MITF:UBE2D3:ELOVL6:MEF2C:KLHL3:CPEB4:TFAP2B:LMBRD1:MAP3K7:EPHA7:POU3F2:QKI:MMP16:SMARCA2:GABBR2:CELF2:KIAA1217:SORCS3:SORCS1:CKAP5:LRP4:CTD-2132H18.3:SENP1:PITPNM2:SETD8:ZNF664:POU4F1:SOCS4:BCL11B:HOXB13:ESCO1:INSM1:THBD	http://www.gsea-msigdb.org/gsea/msigdb/human/geneset/TAGCTTT_MIR9
microRNA_targets	MIR4766_5P	317	50	0.000189108	0.024529	STMN1:PIGV:USP33:FAM102B:PQLC3:KIAA1841:MGAT4A:AFF3:DPP4:TMEM237:INO80D:KAT2B:RBMS3:PPP4R2:CADM2:VGLL3:CGGBP1:KALRN:POU4F2:EDNRA:IRX1:ADAMTS16:PLCXD3:NNT:HCN1:MBLAC2:FBXL17:AUTS2:C8orf33:ZDHHC21:TRIM14:RTKN2:HIF1AN:FGFR2:ETNK1:SLC38A1:ASB8:CCNT1:DIP2B:SLC4A8:PARPBP:HCAR3:ATP6V0A2:BAG5:SLC30A4:POLR2M:XYLT1:GOT2:ARHGAP28:SMAD4	http://www.gsea-msigdb.org/gsea/msigdb/human/geneset/MIR4766_5P
microRNA_targets	MIR944	409	61	0.000199044	0.024529	LPPR5:DENND1B:PTPRC:ODC1:LPIN1:HNMT:COBLL1:CYBRD1:GPR155:TMEM237:INO80D:IKZF2:SPAG16:BHLHE40:KAT2B:RBMS3:NDUFAF3:CISH:APPL1:CADM2:POU1F1:HTR1F:TSC22D2:GFM1:ANTXR2:PPP3CA:HCN1:POLR3G:NR2F1:NUDT12:CAMK4:COL19A1:FUT9:QKI:TMEM106B:TFEC:MMP16:PDCL:DDX31:GPSM1:CUBN:MPP7:RTKN2:SCD:MCMBP:BDNF:METTL15:SSPN:LARP4:NPAS3:SOCS4:RTN1:BCL11B:TRAF3:MYEF2:FBN1:NPEPPS:HOXB2:SPOP:HRH4:DCC	http://www.gsea-msigdb.org/gsea/msigdb/human/geneset/MIR944
microRNA_targets	MIR559	538	76	0.000207713	0.024529	MTF1:LRRC7:FAM73A:DNAJB4:DENND1B:PAPOLG:KIAA1841:MFSD9:LRP1B:ZEB2:GPD2:CYBRD1:DYNC1I2:GPR155:CARF:UNC80:ACADL:LANCL1:IKZF2:SEC22C:FAM198A:DUSP7:CACNA2D3:ERC2:C3orf38:LSAMP:HLTF:KPNA4:CCSER1:GRID2:DNAJB14:NFKB1:CISD2:PITX2:AP1AR:SMAD5:YIPF5:PRELID2:MUT:BAI3:FUT9:GOPC:THSD7A:MDFIC:MMP16:ZDHHC21:ZFAND5:C9orf40:COMMD3-BMI1:BMI1:TRUB1:NUP160:GRM5:SOX5:SENP1:LARP4:DIP2B:TMTC3:IGF1:ZCCHC8:TBC1D4:FBXL3:S…	http://www.gsea-msigdb.org/gsea/msigdb/human/geneset/MIR559
microRNA_targets	MIR579_3P	496	71	0.000223212	0.0252133	PDIK1L:DEPDC1:GIPC2:SAMD13:NTNG1:TPR:NEK7:C2orf43:PAPOLG:HNMT:COBLL1:C2orf88:ABI2:KCNH8:NKTR:ANO10:GNAT1:ROBO2:CADM2:VGLL3:LSAMP:PPP2R3A:STAG1:NCK1:WWTR1:PPM1L:ANTXR2:CCSER1:DAPP1:DNAJB14:SEC24B:METTL14:C5orf49:PJA2:CTNNA1:KCTD16:MAP3K7:FUT9:POU3F2:GOPC:PHACTR2:QKI:THSD7A:CALN1:CAV2:NAA38:KIAA0196:GLIS3:NFIB:NTRK2:NET1:STAM:ENTPD7:CWF19L1:UVRAG:ETNK1:SSPN:TMTC3:POC1B:TBC1D4:NPAS3:BCL11B:MYEF2:PRT…	http://www.gsea-msigdb.org/gsea/msigdb/human/geneset/MIR579_3P
microRNA_targets	MIR493_5P	446	65	0.000243706	0.0263811	CAMK2N1:FOXJ3:AK5:FUBP1:BCL11A:UNC50:AFF3:MCM6:MLTK:TMEM237:RAPH1:KCNJ13:KRBOX1:ERC2:PDZRN3:CADM2:KALRN:TSC22D2:KPNA4:PRDM8:GRID2:SEC24B:NDST3:SLC10A7:HMGCS1:PAIP1:MEF2C:KIAA0825:FER:MCUR1:SMAP1:EPHA7:FAXC:HIVEP2:NXPH1:THSD7A:TMEM106B:CALN1:CAPZA2:CPNE3:ZFAND5:AGTPBP1:GOLM1:PTCH1:CELF2:STAM:OTUD1:SORCS3:KIF18A:GRM5:LARP4:KDM2B:CLIP1:SBNO1:FBXL3:NPAS3:HIF1A:RSL24D1:RP11-667K14.8:HSF5:PIK3C3:SYT4:T…	http://www.gsea-msigdb.org/gsea/msigdb/human/geneset/MIR493_5P
microRNA_targets	MIR4652_3P	323	50	0.000298386	0.0310083	SSX2IP:DENND1B:BCL11A:C2orf88:BMPR2:CARF:EPHA4:RBMS3:IFRD2:CACNA2D2:POU1F1:P2RY14:PPP3CA:OTUD4:TMEM161B:MEF2C:KIAA0825:COL19A1:POU3F2:PLN:ELFN1:TRIQK:FAM92A1:TMEM67:DMRT1:ZDHHC21:C9orf41:OSTF1:TLR4:RC3H2:ZBTB6:GTF3C4:COX15:ETNK1:SLC38A1:ASB8:DIP2B:KCTD12:SLC38A6:SNAPC1:SLC30A4:TCF12:TSR1:NPEPPS:ZNF652:TCF4:LRP3:LSM14A:THBD:ZNF75D	http://www.gsea-msigdb.org/gsea/msigdb/human/geneset/MIR4652_3P
microRNA_targets	MIR22_3P	135	26	0.000310891	0.0310652	PDIK1L:MTF1:INPP5B:GIGYF2:SNRK:MSL2:ELOVL6:PLCXD3:SMAP1:FUT9:GABBR2:NET1:SEPHS1:FRAT2:TRUB1:EMX2:LIN7C:DAGLA:GRM5:NPAS3:RCOR1:GATM:ZCCHC14:C17orf58:RFXANK:NAA20	http://www.gsea-msigdb.org/gsea/msigdb/human/geneset/MIR22_3P
microRNA_targets	MIR4259	26	9	0.000395769	0.0380817	RHOA:FHIT:CCL28:KLHL7:RBM18:PDZD7:EIF2B1:NPAS3:MYEF2	http://www.gsea-msigdb.org/gsea/msigdb/human/geneset/MIR4259
microRNA_targets	MIR664B_3P	491	69	0.000459843	0.0426669	PDIK1L:DEPDC1:GIPC2:SAMD13:NTNG1:TPR:C2orf43:PAPOLG:HNMT:COBLL1:C2orf88:ABI2:KCNH8:NKTR:ANO10:GNAT1:ROBO2:CADM2:VGLL3:LSAMP:PPP2R3A:STAG1:NCK1:WWTR1:PPM1L:ANTXR2:CCSER1:DAPP1:DNAJB14:SEC24B:METTL14:C5orf49:PJA2:CTNNA1:MAP3K7:FUT9:POU3F2:GOPC:PHACTR2:QKI:THSD7A:CALN1:CAV2:NAA38:KIAA0196:GLIS3:NFIB:NTRK2:NET1:STAM:ENTPD7:CWF19L1:UVRAG:ETNK1:SSPN:TMTC3:POC1B:TBC1D4:NPAS3:BCL11B:MYEF2:PRTG:POLR2M:C16…	http://www.gsea-msigdb.org/gsea/msigdb/human/geneset/MIR664B_3P
microRNA_targets	MIR3662	936	118	0.000562725	0.0493454	PTPRF:LHX8:SLC44A5:PIGK:FAM102B:CKS1B:DENND1B:NEK7:BCL11A:MGAT4A:C2ORF15:MRPL30:ZEB2:DPP4:DYNC1I2:TRAK2:BMPR2:FAM117B:INO80D:UNC80:ERBB4:IKZF2:ABCA12:UGT1A10:UGT1A7:RBMS3:STT3B:SEC22C:ZNF197:PBRM1:FAM208A:APPL1:CADM2:POU1F1:CGGBP1:LSAMP:KALRN:STAG1:WWTR1:KPNA4:PPM1L:PAQR3:FGF5:DNAJB14:PPP3CA:OXCT1:C5orf51:CKS1B:MEF2C:MBLAC2:LYSMD3:NR2F1:EFNA5:FER:SLC25A46:CAMK4:YIPF5:PGK2:COL19A1:SMAP1:EPHA7:GPR6…	http://www.gsea-msigdb.org/gsea/msigdb/human/geneset/MIR3662
microRNA_targets	MIR576_5P	332	50	0.000569808	0.0493454	YBX1:E2F6:MGAT4A:COBLL1:ITGA6:ICA1L:RBMS3:TCAIM:FAM208A:APPL1:CADM2:HTR1F:NCK1:LAMTOR3:CISD2:NDST3:NR3C2:CETN3:SLCO4C1:C5orf30:EFNA5:FBXL17:PJA2:CAMK4:FUT9:FAXC:GOPC:AHI1:VTA1:CAV1:CAPZA2:CPNE3:ZDHHC21:FREM1:ENKUR:C10orf88:KCNA4:CKAP5:GRM5:ETNK1:BCAT1:LARP4:TMTC3:LUM:RSRC2:COMMD6:LYSMD4:ZNF181:SAMSN1:CXADR	http://www.gsea-msigdb.org/gsea/msigdb/human/geneset/MIR576_5P
Chemical_and_Genetic_pertubation	NIKOLSKY_BREAST_CANCER_8Q23_Q24_AMPLICON	149	38	8.12836e-09	2.76771e-05	C8orf76:KIAA0196:FAM83H:EPPK1:PLEC:PARP10:GRINA:SPATC1:OPLAH:CYC1:SHARPIN:MAF1:MROH1:SLC52A2:FBXL6:ADCK5:SLC39A4:VPS28:TONSL:CYHR1:KIFC2:FOXH1:PPP1R16A:GPT:MFSD3:RECQL4:LRRC14:LRRC24:C8orf82:ARHGAP39:ZNF251:ZNF34:RPL8:ZNF517:ZNF7:ZNF250:ZNF16:C8orf33	http://www.gsea-msigdb.org/gsea/msigdb/human/geneset/NIKOLSKY_BREAST_CANCER_8Q23_Q24_AMPLICON
Chemical_and_Genetic_pertubation	HESSON_TUMOR_SUPPRESSOR_CLUSTER_3P21_3	8	7	4.67942e-07	0.000600034	HYAL2:RASSF1:ZMYND10:NPRL2:CYB561D2:TMEM115:CACNA2D2	http://www.gsea-msigdb.org/gsea/msigdb/human/geneset/HESSON_TUMOR_SUPPRESSOR_CLUSTER_3P21_3
Chemical_and_Genetic_pertubation	LASTOWSKA_NEUROBLASTOMA_COPY_NUMBER_DN	777	115	5.75287e-07	0.000600034	TNFRSF25:TARDBP:MAD2L2:SEPN1:MTFR1L:PAQR7:STMN1:PAFAH2:CEP85:SH3BGRL3:CD52:PIGV:ZDHHC18:MEAF6:SNIP1:DNALI1:EPHA10:MANEAL:C1orf122:MTF1:SF3A3:UTP11L:RRAGC:COL9A2:FOXJ3:ZMYND12:PPCS:CCDC23:MED8:SZT2:HYI:PTPRF:KDM4A:ST3GAL3:IPO13:ATP6V0B:DMAP1:ERI3:RNF220:FAF1:PIGK:USP33:FAM73A:PTGFR:SSX2IP:PTBP2:IQSEC1:NUP210:FGD5:RAB5A:RBMS3:STT3B:EIF1B:ZNF621:CTNNB1:TRAK1:SEC22C:SS18L2:NKTR:KRBOX1:ZKSCAN7:ZNF502:…	http://www.gsea-msigdb.org/gsea/msigdb/human/geneset/LASTOWSKA_NEUROBLASTOMA_COPY_NUMBER_DN
Chemical_and_Genetic_pertubation	NIKOLSKY_BREAST_CANCER_15Q26_AMPLICON	21	11	7.04886e-07	0.000600034	FAM169B:IGF1R:SYNM:TTC23:LRRC28:LYSMD4:LINS:ASB7:CHSY1:VIMP:SNRPA1	http://www.gsea-msigdb.org/gsea/msigdb/human/geneset/NIKOLSKY_BREAST_CANCER_15Q26_AMPLICON
Chemical_and_Genetic_pertubation	ROVERSI_GLIOMA_COPY_NUMBER_UP	97	23	2.48002e-05	0.016889	GALNT5:ARHGAP1:CKAP5:LRP4:PACSIN3:DDB2:ACP2:NR1H3:MADD:MYBPC3:SPI1:PSMC3:PTPRJ:GALNT6:APOC4-APOC2:APOC4:APOC2:CLPTM1:CLASRP:MARK4:EXOC3L2:CKM:KLC3:ERCC2	http://www.gsea-msigdb.org/gsea/msigdb/human/geneset/ROVERSI_GLIOMA_COPY_NUMBER_UP
Chemical_and_Genetic_pertubation	NIKOLSKY_BREAST_CANCER_16P13_AMPLICON	115	25	5.37689e-05	0.0305138	HBM:HBA2:HBA1:ARHGDIG:NME4:NHLRC4:METRN:FAM173A:CCDC78:HAGHL:NARFL:RPUSD1:CHTF18:LMF1:RP11-161M6.2:SOX8:TPSG1:TPSD1:BAIAP3:C16orf91:HN1L:MAPK8IP3:EME2:NUBP2:NDUFB10:RNF151:ZG16B	http://www.gsea-msigdb.org/gsea/msigdb/human/geneset/NIKOLSKY_BREAST_CANCER_16P13_AMPLICON
