# Supplementary material
Source: Research Square preprint supplement (doi:10.21203/rs.3.rs-8283198/v1)
Supplement: Supplementary file 2 [file 6c5b71c0b1383087dd0697a3.docx]

**Supplementary Table 1. Risks of Belonging to Each Trajectory Group of ADHD Symptoms**

| Group | OR | SE | P-value |
| --- | --- | --- | --- |
| 1 | ref | - | - |
| 2 | 1.031 | 0.019 | 0.174 |
| 3 | 1.182 | 0.022 | 0.028* |

Abbreviations: OR, odds ratio; SE, standard error; * indicates P-value less than 0.05.

**Supplementary Table 3. Sensitivity analysis using different MR methods.**

| **Exposure** | **Outcome** | **Method** | **SNP (N)** | **beta** | **SE** | **P** |
| --- | --- | --- | --- | --- | --- | --- |
| Adiponectin | ADHD | MR Egger | 180 | 0.121 | 0.053 | 0.025* |
|  |  | Weighted median | 180 | 0.007 | 0.041 | 0.872 |
|  |  | Simple mode | 180 | -0.442 | 0.099 | 0.000*** |
|  |  | Weighted mode | 180 | 0.039 | 0.057 | 0.490 |
| **Exposure** | **Outcome** | **Method** | SNP (N) | beta | SE | P |
| ADHD | Adiponectin | MR Egger | 84 | -0.160 | 0.053 | 0.00322** |
|  |  | Weighted median | 84 | -0.060 | 0.008 | 4.427x10-14*** |
|  |  | Simple mode | 84 | -0.068 | 0.019 | 0.00067*** |
|  |  | Weighted mode | 84 | -0.066 | 0.018 | 0.00036*** |

Abbreviations: MR, Mendelian Randomization; SNP, single nucleotide polymorphism; SE, standard error. * Indicates P-value less than 0.05, ** indicates P-value less than 0.01, *** indicates P-value less than 0.001.

**Supplementary Table 4. Pleiotropy and Heterogeneity analysis of Mendelian Randomization analysis.**

| pleiotropy test | | |  | heterogeneity test | | | |
| --- | --- | --- | --- | --- | --- | --- | --- |
| MR-Egger intercept | Standard error | P |  | method | Q | Q_df | P |
|  | MR Egger | 202.433 | 299 | 0.999 |
| -0.003 | 0.002 | 0.140 |  | Inverse variance weighted | 204.625 | 300 | 0.999 |

Abbreviations: df, degree of freedom

**Supplementary figure 1. Scatterplots of MR analysis using different approaches.**

Exposure is ADHD and outcome is adiponectin levels.

Abbreviation: SNP, single nucleotide polymorphism

**Supplementary figure 2. The leave-one-out analysis of MR analysis for ADHD on adiponectin levels.**
